# Supplementary material for: New metal–organic frameworks derived from pyridine-3,5-dicarboxylic acid: structural diversity arising from the addition of templates into the reaction systems
Source: Royal Society of Chemistry journal article supplement (doi:10.1039/c9ce02006c), 2020-01-01
Supplement: c9ce02006c1.pdf [file c9ce02006c1.pdf]

## Electronic Supplementary Information

### **New Metal Organic Frameworks Derived from pyridine-3,5-dicarboxylic acid: Structural Diversity Rising from the Addition of Templates in the Reaction Systems**

Eleni E. Moushi,<sup>a</sup> Andreas Kourtellaris,<sup>a,b</sup> Eleni Andreou,<sup>b</sup> Athina Fidelli,<sup>c</sup> Giannis S. Papaefstathiou,<sup>\*,c</sup> John C. Plakatouras<sup>\*,b,d,e</sup> and Anastasios J. Tasiopoulos<sup>\*,b</sup>

<sup>a</sup> Department of Life Sciences, School of Science, European University Cyprus, 1516 Nicosia, Cyprus

<sup>b</sup> Department of Chemistry, University of Cyprus, Nicosia 1678, Cyprus

<sup>c</sup> Laboratory of Inorganic Chemistry, Department of Chemistry, National and Kapodistrian University of Athens, Panepistimiopolis Zografou 157 71, Greece

<sup>d</sup> University Research Center of Ioannina (URCI), Institute of Materials Science and Computing, Ioannina, Greece

<sup>e</sup> On sabbatical leave from Department of Chemistry, University of Ioannina, 451 10 Ioannina, Greece

## Contents

### 1. Experimental

2. **Table S2** Selected bond distances (Å) and angles (°) for  $[[[(CH_3)_2NH_2]_2[Cd_2(PDC)_3]]_n \cdot 4nDMF \cdot 6nH_2O]$ , [1].
3. **Table S3** Selected bond distances (Å) and angles (°) for  $[Mn(PDC)(DMF)]_n$  [2]
4. **Table S4** Selected bond distances (Å) and angles (°) for  $[Mn_3(PDC)_2(INA)_2(DMF)_{1.5}(H_2O)_{0.5}]_n \cdot nDMF \cdot 2nH_2O$ , [3].
5. **Table S5** Selected bond distances (Å) and angles (°) for  $[Zn(PDC)(NMP)]_n \cdot nH_2O$ , [4].
6. **Table S6** Selected bond distances (Å) and angles (°) for  $[Zn(PDC)(H_2O)(DMF)]_n$ , [5].
7. **Table S7** Selected bond distances (Å) and angles (°) for  $[Zn(PDC)(3hmpH)]_n \cdot nDMF \cdot 0.5nH_2O$ , [6].
8. **Table S8** Selected bond distances (Å) and angles (°) for  $[Zn(PDC)(2hmpH)_2]_2 \cdot 2DMF$ , [7].
9. **Table S9** Selected bond distances (Å) and angles (°) for  $[Co(PDC)(3hmpH)_2]_n \cdot 0.25nDMF$ , [8].
10. **Table S10** Selected bond distances (Å) and angles (°) for  $[Cu(PDC)(3hmpH)_2]_n \cdot 0.5nDMF \cdot 1.5nH_2O$ , [9].
11. **Table S11** Geometrical characteristics (distances in Å and angles in °) of the conventional H-bonds found in  $[Zn(PDC)(H_2O)(DMF)]_n$ , [5]
12. **Table S12** Geometrical characteristics (distances in Å and angles in °) of the conventional H-bonds found in  $[Zn(PDC)(2hmpH)_2]_2 \cdot 2DMF$ , [7].
13. **Table S13** Geometrical characteristics (distances in Å and angles in °) of the conventional H-bonds found in  $[Co(PDC)(3hmpH)_2]_n \cdot 0.25nDMF$ , [8].
14. **Table S14** Geometrical characteristics (distances in Å and angles in °) of the conventional H-bonds found in  $[Cu(PDC)(3hmpH)_2]_n \cdot 0.5nDMF \cdot 1.5nH_2O$ , [9].
15. **Table S15** Thermogravimetric analysis (TG) data for the prepared compounds.
16. **Table S16.**  $PDC^{2-}$  2D coordination polymers with honeycomb topology.
17. **Fig. S1** The simulated and experimental XRD powder patterns for [1].
18. **Fig. S2** The simulated and experimental XRD powder patterns for [2].
19. **Fig. S3** The simulated and experimental XRD powder patterns for [3].
20. **Fig. S4** The simulated and experimental XRD powder patterns for [4].
21. **Fig. S5** The simulated and experimental XRD powder patterns for [5].
22. **Fig. S6** The simulated and experimental XRD powder patterns for [6].
23. **Fig. S7** The simulated and experimental XRD powder patterns for [7].
24. **Fig. S8** The simulated and experimental XRD powder patterns for [8].
25. **Fig. S9** The simulated and experimental XRD powder patterns for [9].
26. **Fig. S10** Solvent accessible void space in the anionic network in [1] down to *a* (a) and to *c* (b). This is where the cations and the solvated molecules are accommodated.

27. **Fig. S11** Solvent accessible void space in the network in **[2]** after the removal of the coordinated DMF molecules down to *a* (a), *b* (b), and *c* (c).
28. **Fig. S12** Solvent accessible void space in the network in **[3]** after the removal of the coordinated DMF molecules down to *a* (a).
29. **Fig. S13** Solvent accessible void space in the network in **[4]** down to *a* (a).
30. **Fig. S14** A perspective view of the pcu framework formed in **[7]** via  $\pi - \pi$  stacking interactions. The network nodes are located on the centroids of the binuclear complex.
31. **Fig. S15** The TG/DTG curves for  $[(\text{CH}_3)_2\text{NH}_2]_2[\text{Cd}_2(\text{PDC})_3]_n \cdot 4n\text{DMF} \cdot 6n\text{H}_2\text{O}$ , **[1]**.
32. **Fig. S16** The TG/DTG curves for  $[\text{Mn}(\text{PDC})(\text{DMF})]_n$ , **[2]**
33. **Fig. S17** The TG/DTG curves for  $[\text{Mn}_3(\text{PDC})_2(\text{INA})_2(\text{DMF})_{1.5}(\text{H}_2\text{O})_{0.5}]_n \cdot n\text{DMF} \cdot 2n\text{H}_2\text{O}$ , **[3]**.
34. **Fig. S18** The TG/DTG curves for  $[\text{Zn}(\text{PDC})(\text{NMP})]_n \cdot n\text{H}_2\text{O}$ , **[4]**.
35. **Fig. S19** The TG/DTG curves for  $[\text{Zn}(\text{PDC})(\text{H}_2\text{O})(\text{DMF})]_n$ , **[5]**.
36. **Fig. S20** The TG/DTG curves for  $[\text{Zn}(\text{PDC})(3\text{hmpH})]_n \cdot n\text{DMF} \cdot 0.5n\text{H}_2\text{O}$ , **[6]**.
37. **Fig. S21** The TG/DTG curves for  $[\text{Zn}(\text{PDC})(2\text{hmpH})_2]_2 \cdot 2\text{DMF}$ , **[7]**.
38. **Fig. S22** The TG/DTG curves for  $[\text{Co}(\text{PDC})(3\text{hmpH})_2]_n \cdot 0.25n\text{DMF}$ , **[8]**.
39. **Fig. S23** The TG/DTG curves for  $[\text{Cu}(\text{PDC})(3\text{hmpH})_2]_n \cdot 0.5n\text{DMF}$ , **[9]**.

## 1. Experimental

**Materials.** Reagent grade chemicals were obtained from Aldrich and used without further purification. Water was distilled in-house.

**Physical Measurements.** Elemental analysis (C, H, N) was performed by the in-house facilities of the University of Cyprus, Chemistry Department on a Eurovector EA3000 Elemental Analyzer. IR spectra were recorded on KBr pellets in the 4000–400  $\text{cm}^{-1}$  range using a Shimadzu Prestige –21 spectrometer. PXRD diffraction pattern was recorded on a Shimadzu 6000 Series X-ray diffractometer (Cu  $K\alpha$  radiation,  $\lambda = 1.5418 \text{ \AA}$ ). Thermal stability studies were performed with a Shimadzu TGA 50 thermogravimetric analyzer.

**Single Crystal X-ray Crystallography.** Single crystal X-ray diffraction data were collected on an Oxford-Diffraction Supernova diffractometer, equipped with an Atlas CCD area detector utilizing Cu  $K\alpha$  ( $\lambda = 1.54184 \text{ \AA}$ ) radiation. Suitable crystal was attached to Hampton cryoloops using paratone-N oil and transferred to the goniostat where they were cooled for data collection. Empirical absorption corrections (multiscan based on symmetry-related measurements) were applied using CrysAlis RED software.<sup>1</sup> The same software package was used for data collection, cell refinement and data reduction. The structures were solved by direct methods using either SIR2014<sup>2</sup> or SHELXS,<sup>3</sup> via the WinGX<sup>4</sup> interface. They are refined on  $F^2$  using full-matrix least-squares with SHELXL-2016/6<sup>5</sup> via the ShelXle<sup>6</sup> interface. The non-H atoms were treated anisotropically, whereas the aromatic H atoms were placed in calculated, ideal positions and refined as riding on their respective carbon atoms. Some of the O–H hydrogen atoms were located from difference Fourier maps and refined isotropically using SHELX restraints; others could not be located and they were placed in calculated positions using CALC-OH.<sup>7</sup> Electron density contributions from disordered guest molecules (and dimethylammonium cations in case of **[1]**) were handled using the SQUEEZE procedure from the PLATON software suit.<sup>8</sup> PLATON and DIAMOND<sup>9</sup> were used for geometric calculations, and X-Seed<sup>10</sup> for molecular graphics. The topological evaluation of the networks was performed with ToposPro.<sup>11</sup> Solvent accessible volumes were calculated with Mercury.<sup>12</sup> Selected crystal data for **[1]** – **[9]** are summarized in Table S1. Selected bond distances ( $\text{\AA}$ ) and angles ( $^\circ$ ) are presented in Tables S2 – S10, respectively. CCDC 1958501-1958509 contain the supplementary crystallographic data for this paper. These data can be obtained free of charge via [www.ccdc.cam.ac.uk/data\\_request/cif](http://www.ccdc.cam.ac.uk/data_request/cif).

## References

- 1 Oxford Diffraction, CrysAlis CCD and CrysAlis RED, Oxford Diffraction Ltd., Abingdon, UK, 2008.
- 2 M. C. Burla, R. Caliendo, B. Carrozzini, G. L. Cascarano, C. Cuocci, C. Giacovazzo, M. Mallamo, A. Mazzone, G. Polidori, *J. Appl. Cryst.*, 2015, **48**, 306-309.
- 3 G. M. Sheldrick, *Acta Crystallogr.*, 2008, **A64**, 112-122.
- 4 L. J. Farrugia, *J. Appl. Cryst.*, 2012, **45**, 849-854.
- 5 G. M. Sheldrick, *Acta Crystallogr.*, 2015, **C71**, 3-8.
- 6 C. B. Hübschle, G. M. Sheldrick, B. Dittrich, *J. Appl. Cryst.*, 2011, **44**, 1281–1284.
- 7 M. Nardelli, *J. Appl. Cryst.*, 1999, **32**, 563-571.
- 8 A. L. Spek, *J. Appl. Crystallogr.*, 2003, **36**, 7-13.
- 9 K. Brandenburg, DIAMOND, Version 2003.2001d, Crystal Impact GbR: Bonn, Germany, 2006.
- 10 L. J. Barbour, *J. Supramol. Chem.*, 2001, **1**, 189-191.
- 11 V. A. Blatov, A. P. Shevchenko, D. M. Proserpio, *Cryst. Growth Des.*, 2014, **14**, 3576–3586.
- 12 C. F. Macrae, I. J. Bruno, J. A. Chisholm, P. R. Edgington, P. McCabe, E. Pidcock, L. Rodriguez-Monge, R. Taylor, J. van de Streek, P. A. Wood, *J. Appl. Cryst.*, 2008, **41**, 466-470.

**Synthesis of  $[(\text{CH}_3)_2\text{NH}_2]_2[\text{Cd}_2(\text{PDC})_3]_n \cdot 4n\text{DMF} \cdot 6n\text{H}_2\text{O}$ , **[1]**.** *Method A:* PDCH<sub>2</sub> (0.050 g, 0.299 mmol) was dissolved (after sonication for 3 minutes) in DMF (8 mL) in a 20 mL glass vial and to this solution was added deaH<sub>2</sub> (2.00 mL, 20.734 mmol). The mixture was sonicated for 3 minutes and to

the resulting solution was added solid  $\text{CdCl}_2$  (0.100 g, 0.545 mmol). The mixture was sonicated for 3 min, sealed and then, heated without stirring at 100 °C for 48 h. During this period, white polyhedral-like crystals of **[1]** were formed. They were isolated by filtration, washed several times with DMF and diethylether, and dried under vacuum. Yield: 75 mg (62 % based on  $\text{PDCH}_2$ ). Elemental analysis: Anal. Calc. for  $\text{C}_{37}\text{H}_{65}\text{N}_9\text{O}_{22}\text{Cd}_2$  (**[1]**) C 36.64, H 5.40, N 10.39, Found: C 36.78, H 5.51, N 10.61 %. IR data ( $\text{cm}^{-1}$ ): 3300mbr  $\nu(\text{OH})$ , 3080w  $\nu(\text{CH})_{\text{ar}}$ , 2958w  $\nu(\text{CH})_{\text{al}}$ , 2812w  $\nu(\text{NH})$ , 1667m  $\nu(\text{CO})_{\text{DMF}}$ , 1603s  $\nu(\text{CC})$ , 1560s, 1387ms  $\nu(\text{CO}_2)$ , 1429m  $\nu(\text{CN})_{\text{ar}}$ .

**Method B:** The same procedure was repeated replacing  $\text{deaH}_2$  with  $\text{teaH}_3$  (2.00 mL, 15.068 mmol). Yield: ~ 61 %.

**Synthesis of  $[\text{Mn}(\text{PDC})(\text{DMF})]_n$ , **[2]**.** **Method A:**  $\text{PDCH}_2$  (0.050 g, 0.299 mmol) was dissolved (after sonication for 3 minutes) in DMF (8 mL) in a 20 mL glass vial and to this solution was added  $\text{phdeaH}_2$  (0.200 g, 1.104 mmol). The mixture was sonicated for 3 minutes and to the resulting solution was added solid  $\text{Mn}(\text{NO}_3)_2 \cdot 4\text{H}_2\text{O}$  (0.100 g, 0.398 mmol). The mixture was sonicated for 3 min, sealed and then, heated without stirring at 100 °C for 48 h. During this period, pinkish polyhedral-like crystals of **[2]** were formed. They were isolated by filtration, washed several times with DMF and diethylether, and dried under vacuum. Yield: 52 mg (59 % based on  $\text{PDCH}_2$ ). Elemental analysis: Anal. Calc. for  $\text{C}_{10}\text{H}_{10}\text{N}_2\text{O}_5\text{Mn}$  (**[2]**) C 40.97, H 3.44, N 9.56, Found: C 40.80, H 3.51, N 9.30 %. IR data ( $\text{cm}^{-1}$ ): 3072w  $\nu(\text{CH})_{\text{ar}}$ , 1670s  $\nu(\text{CO})_{\text{DMF}}$ , 1605m  $\nu(\text{CC})$ , 1560s, 1391ms  $\nu(\text{CO}_2)$ , 1431m  $\nu(\text{CN})_{\text{ar}}$ .

**Methods B, C, D:** Method A was repeated, using  $\text{2hmpH}$  (200  $\mu\text{L}$ , 2.073 mmol)(B) or  $\text{3hmpH}$  (200  $\mu\text{L}$ , 2.073 mmol)(C) or  $\text{3hppH}$  (200  $\mu\text{L}$ , 1.545 mmol)(D) instead of  $\text{phdeaH}_2$ . The yields span the range 58 – 59 %.

**Method E:** **[2]** can be synthesized successfully in the absence of any template molecule with similar yield.

**Synthesis of  $[\text{Mn}_3(\text{PDC})_2(\text{INA})_2(\text{DMF})_{1.5}(\text{H}_2\text{O})_{0.5}]_n \cdot n\text{DMF} \cdot 2n\text{H}_2\text{O}$ , **[3]**.**  $\text{PDCH}_2$  (0.050 g, 0.299 mmol) was dissolved (after sonication for 3 minutes) in DMF (8 mL) in a 20 mL glass vial and to this solution was added  $\text{4hmpH}$  (0.200 g, 1.833 mmol). The mixture was sonicated for 3 minutes and to the resulting solution was added solid  $\text{Mn}(\text{NO}_3)_2 \cdot 4\text{H}_2\text{O}$  (0.100 g, 0.398 mmol). The mixture was sonicated for 3 min, sealed and then, heated without stirring at 100 °C for 48 h. During this period, very pale pink polyhedral-like crystals of **[3]** were formed. They were isolated by filtration, washed several times with DMF and diethylether, and dried under vacuum. Yield: 105 mg (72 % based on  $\text{PDCH}_2$ ). Elemental analysis: Anal. Calc. for  $\text{C}_{33.5}\text{H}_{36.5}\text{N}_{6.5}\text{O}_{17}\text{Mn}_3$  (**[3]**) C 41.61, H 3.80, N 9.42, Found: C 41.83, H 3.65, N 9.59 %. IR data ( $\text{cm}^{-1}$ ): 3317mbr  $\nu(\text{OH})$ , 3072w  $\nu(\text{CH})_{\text{ar}}$ , 2927w  $\nu(\text{CH})_{\text{al}}$ , 1667s  $\nu(\text{CO})_{\text{DMF}}$ , 1600m  $\nu(\text{CC})$ , 1552s, 1384ms  $\nu(\text{CO}_2)$ .

**Synthesis of  $[\text{Zn}(\text{PDC})(\text{NMP})]_n \cdot n\text{H}_2\text{O}$ , **[4]**.**  $\text{PDCH}_2$  (0.050 g, 0.299 mmol) was dissolved (after sonication for 3 minutes) in NMP (8 mL) and to this solution was added  $\text{pdH}_2$  (200  $\mu\text{L}$ , 2.786 mmol). The mixture was sonicated for 3 minutes and to the resulting solution was added solid  $\text{Zn}(\text{O}_2\text{CMe})_2 \cdot 2\text{H}_2\text{O}$  (0.100 g, 0.455 mmol). The mixture was sonicated for 3 min, and sealed in a 23 mL Teflon-lined autoclave and then, heated at 150 °C for 48 h. The autoclave left to cool slowly at room temperature. Colourless polyhedral-like crystals of **[4]** were formed. They were isolated by filtration, washed several times successively with NMP, DMF and diethylether, and dried under vacuum. Yield: 84 mg (81 % based on  $\text{PDCH}_2$ ). Elemental analysis: Anal. Calc. for  $\text{C}_{12}\text{H}_{14}\text{N}_2\text{O}_6\text{Zn}$  (**[4]**) C 41.46, H 4.06, N 8.06, Found: C 41.44, H 4.23, N 8.10 %. IR data ( $\text{cm}^{-1}$ ): 3279mbr, 2889wbr  $\nu(\text{OH})$ , 3100w  $\nu(\text{CH})_{\text{ar}}$ , 2969w  $\nu(\text{CH})_{\text{al}}$ , 1667m  $\nu(\text{CO})_{\text{NMP}}$ , 1609s  $\nu(\text{CC})$ , 1567s, 1407ms  $\nu(\text{CO}_2)$ , 1430m  $\nu(\text{CN})_{\text{ar}}$ .

**Synthesis of  $[\text{Zn}(\text{PDC})(\text{H}_2\text{O})(\text{DMF})]_n$ , **[5]**.** **Method A:**  $\text{PDCH}_2$  (0.050 g, 0.299 mmol) was dissolved (after sonication for 3 minutes) in DMF (8 mL) in a 20 mL glass vial and to this solution was added  $\text{phdeaH}_2$  (0.200 g, 1.104 mmol). The mixture was sonicated for 3 minutes and to the resulting solution was added solid  $\text{Zn}(\text{NO}_3)_2 \cdot 6\text{H}_2\text{O}$  (0.100 g, 0.336 mmol). The mixture was sonicated for 3 min, sealed and then, heated without stirring at 100 °C for 48 h. During this period, colourless

polyhedral-like crystals of **[5]** were formed. They were isolated by filtration, washed several times with DMF and diethylether, and dried under vacuum. Yield: 64 mg (67 % based on PDCH<sub>2</sub>). Elemental analysis: Anal. Calc. for C<sub>10</sub>H<sub>12</sub>N<sub>2</sub>O<sub>6</sub>Zn (**[5]**) C 37.35, H 3.76, N 8.71, Found: C 37.51, H 3.99, N 8.52 %. IR data (cm<sup>-1</sup>): 3278mbr,  $\nu$ (OH), 3103w  $\nu$ (CH)<sub>ar</sub>, 1694m  $\nu$ (CO)<sub>DMF</sub>, 1605s  $\nu$ (CC), 1551s, 1399ms  $\nu$ (CO<sub>2</sub>), 1436m  $\nu$ (CN)<sub>ar</sub>.

Methods B, C, D: Method A was repeated, using deaH<sub>3</sub> (200  $\mu$ L, 2.087 mmol)(B) or teoaH<sub>3</sub> (200  $\mu$ L, 1.507 mmol)(C) or pdH<sub>2</sub> (200  $\mu$ L, 2.768 mmol)(D) instead of phdeaH<sub>2</sub>. The yields span the range 65 – 68 %.

**Synthesis of [Zn(PDC)(3hmpH)]<sub>n</sub>·nDMF·0.5nH<sub>2</sub>O, [6].** PDCH<sub>2</sub> (0.050 g, 0.299 mmol) was dissolved (after sonication for 3 minutes) in DMF (8 mL) in a 20 mL glass vial and to this solution was added 3hmpH (900  $\mu$ L, 9.327 mmol). The mixture was sonicated for 3 minutes and to the resulting solution was added solid Zn(O<sub>2</sub>CMe)<sub>2</sub>·2H<sub>2</sub>O (0.300 g, 1.367 mmol). The mixture was sonicated for 3 min, sealed and then, heated without stirring at 100 °C for 48 h. During this period, white polyhedral-like crystals of **[6]** were formed. They were isolated by filtration, washed several times with DMF and diethylether, and dried under vacuum. Yield: 96 mg (76 % based on PDCH<sub>2</sub>). Elemental analysis: Anal. Calc. for C<sub>16</sub>H<sub>18</sub>N<sub>3</sub>O<sub>6.5</sub>Zn (**[6]**) C 45.57, H 4.30, N 9.96, Found: C 48.43, H 4.11, N 9.69 %. IR data (cm<sup>-1</sup>): 3340mbr,  $\nu$ (OH), 3085w  $\nu$ (CH)<sub>ar</sub>, 2942w  $\nu$ (CH<sub>3</sub>)<sub>DMF</sub>, 2874w  $\nu$ (CH<sub>2</sub>), 1626s  $\nu$ (CO)<sub>DMF</sub>, 1590s  $\nu$ (CC)<sub>ring</sub>, 1568s, 1376s  $\nu$ (CO<sub>2</sub>), 1436m  $\nu$ (CN)<sub>ar</sub>, 1026m  $\nu$ (C-OH).

**Synthesis of [Zn(PDC)(2hmpH)<sub>2</sub>]<sub>2</sub>·2DMF, [7].** PDCH<sub>2</sub> (0.050 g, 0.299 mmol) was dissolved (after sonication for 3 minutes) in DMF (8 mL) in a 20 mL glass vial and to this solution was added 2hmpH (500  $\mu$ L, 5.182 mmol). The mixture was sonicated for 3 minutes and to the resulting solution was added solid Zn(O<sub>2</sub>CMe)<sub>2</sub>·2H<sub>2</sub>O (0.100 g, 0.455 mmol). The mixture was sonicated for 3 min, sealed and then, heated without stirring at 100 °C for 48 h. During this period, colourless polyhedral-like crystals of **[7]** were formed. They were isolated by filtration, washed several times with DMF and diethylether, and dried under vacuum. Yield: 80 mg (51 % based on PDCH<sub>2</sub>). Elemental analysis: Anal. Calc. for C<sub>22</sub>H<sub>24</sub>N<sub>4</sub>O<sub>7</sub>Zn (**[7]**) C 50.64, H 4.64, N 10.74, Found: C 50.93, H 4.70, N 10.41 %. IR data (cm<sup>-1</sup>): 3355mbr,  $\nu$ (OH), 3083w  $\nu$ (CH)<sub>ar</sub>, 2940w  $\nu$ (CH<sub>3</sub>)<sub>DMF</sub>, 2873w  $\nu$ (CH<sub>2</sub>), 1665s  $\nu$ (CO)<sub>DMF</sub>, 1589s  $\nu$ (CC)<sub>ring</sub>, 1588s, 1372s  $\nu$ (CO<sub>2</sub>), 1438m  $\nu$ (CN)<sub>ar</sub>, 1029m  $\nu$ (C-OH).

**Synthesis of [Co(PDC)(3hmpH)<sub>2</sub>]<sub>n</sub>·0.25nDMF, [8].** PDCH<sub>2</sub> (0.050 g, 0.299 mmol) was dissolved (after sonication for 3 minutes) in DMF (8 mL) in a 20 mL glass vial and to this solution was added 3hmpH (1.50 mL, 15.467 mmol). The mixture was sonicated for 3 minutes and to the resulting solution was added solid Co(NO<sub>3</sub>)<sub>2</sub>·6H<sub>2</sub>O (0.100 g, 0.343 mmol). The mixture was sonicated for 3 min, sealed and then, heated without stirring at 100 °C for 48 h. During this period, pink polyhedral-like crystals of **[8]** were formed. They were isolated by filtration, washed several times with DMF and diethylether, and dried under vacuum. Yield: 95 mg (69 % based on PDCH<sub>2</sub>). Elemental analysis: Anal. Calc. for C<sub>19.75</sub>H<sub>18.75</sub>N<sub>3.25</sub>O<sub>6.25</sub>Co (**[8]**) C 51.50, H 4.10, N 9.88, Found: C 51.81, H 4.38, N 10.07 %. IR data (cm<sup>-1</sup>): 3326mbr,  $\nu$ (OH), 3077w  $\nu$ (CH)<sub>ar</sub>, 2891w  $\nu$ (CH<sub>2</sub>), 1587s  $\nu$ (CC)<sub>ring</sub>, 1569s, 1377s  $\nu$ (CO<sub>2</sub>), 1446m  $\nu$ (CN)<sub>ar</sub>, 1023m  $\nu$ (C-OH).

**Synthesis of [Cu(PDC)(3hmpH)<sub>2</sub>]<sub>n</sub>·0.5nDMF, [9].** PDCH<sub>2</sub> (0.050 g, 0.299 mmol) was dissolved (after sonication for 3 minutes) in DMF (8 mL) in a 20 mL glass vial and to this solution was added 3hmpH (1.50 mL, 15.467 mmol). The mixture was sonicated for 3 minutes and to the resulting solution was added solid Cu(NO<sub>3</sub>)<sub>2</sub>·2.5H<sub>2</sub>O (0.100 g, 0.429 mmol). The mixture was sonicated for 3 min, sealed and then, heated without stirring at 100 °C for 48 h. During this period, blue polyhedral-like crystals of **[9]** were formed. They were isolated by filtration, washed several times with DMF and diethylether, and dried under vacuum. Yield: 87 mg (57 % based on PDCH<sub>2</sub>). Elemental analysis: Anal. Calc. for C<sub>20.5</sub>H<sub>20.5</sub>N<sub>3.5</sub>O<sub>6.5</sub>Cu (**[9]**) C 50.93, H 4.27, N 10.14, Found: C 50.48, H 4.55, N 9.79 %. IR data (cm<sup>-1</sup>): 3295mbr,  $\nu$ (OH), 3078w  $\nu$ (CH)<sub>ar</sub>, 2882w  $\nu$ (CH<sub>2</sub>), 1591s  $\nu$ (CC)<sub>ring</sub>, 1557s, 1356s  $\nu$ (CO<sub>2</sub>), 1435m  $\nu$ (CN)<sub>ar</sub>, 1031m  $\nu$ (C-OH).

**Table S1** Selected crystal data and refinement details for the prepared compounds.

| Compound                                      | [1]                                                           | [2]                                                                            | [3]                                                   | [4]                                               | [5]                                                              | [6]                                                              | [7]                                                             | [8]                                                                            | [9]                                                             |                                                                                |
|-----------------------------------------------|---------------------------------------------------------------|--------------------------------------------------------------------------------|-------------------------------------------------------|---------------------------------------------------|------------------------------------------------------------------|------------------------------------------------------------------|-----------------------------------------------------------------|--------------------------------------------------------------------------------|-----------------------------------------------------------------|--------------------------------------------------------------------------------|
| Empirical formula                             | C <sub>21</sub> H <sub>9</sub> N <sub>3</sub> O <sub>12</sub> | Cd <sub>2</sub> C <sub>30</sub> H <sub>30</sub> N <sub>6</sub> O <sub>15</sub> | Mn <sub>3</sub> C <sub>30.97</sub> H <sub>24.94</sub> | Mn <sub>3</sub> N <sub>5.66</sub> O <sub>14</sub> | C <sub>12</sub> H <sub>12</sub> N <sub>2</sub> O <sub>5</sub> Zn | C <sub>10</sub> H <sub>11</sub> N <sub>2</sub> O <sub>6</sub> Zn | C <sub>13</sub> H <sub>9</sub> N <sub>2</sub> O <sub>5</sub> Zn | C <sub>44</sub> H <sub>48</sub> N <sub>8</sub> O <sub>14</sub> Zn <sub>2</sub> | C <sub>19</sub> H <sub>17</sub> CoN <sub>3</sub> O <sub>6</sub> | C <sub>57</sub> H <sub>51</sub> Cu <sub>3</sub> N <sub>9</sub> O <sub>18</sub> |
| Formula weight                                | 720.13                                                        | 879.42                                                                         | 864.87                                                | 329.63                                            | 320.60                                                           | 338.61                                                           | 1043.68                                                         | 442.29                                                                         | 1340.72                                                         |                                                                                |
| Temperature (K)                               | 100                                                           | 113                                                                            | 101                                                   | 100                                               | 100                                                              | 100                                                              | 100                                                             | 100                                                                            | 100                                                             |                                                                                |
| Crystal System                                | orthorhombic                                                  | monoclinic                                                                     | monoclinic                                            | orthorhombic                                      | monoclinic                                                       | orthorhombic                                                     | triclinic                                                       | monoclinic                                                                     | monoclinic                                                      |                                                                                |
| Space group                                   | Cmc2 <sub>1</sub>                                             | P2 <sub>1</sub> /n                                                             | P2 <sub>1</sub> /c                                    | P2 <sub>1</sub> 2 <sub>1</sub> 2 <sub>1</sub>     | P2 <sub>1</sub> /c                                               | P2 <sub>1</sub> 2 <sub>1</sub> 2 <sub>1</sub>                    | P-1                                                             | P2 <sub>1</sub>                                                                | C2/c                                                            |                                                                                |
| <i>a</i> (Å)                                  | 10.1522(3)                                                    | 12.3457(2)                                                                     | 11.5931(6)                                            | 11.203(5)                                         | 11.0431(6)                                                       | 7.878(5)                                                         | 9.0778(8)                                                       | 7.7534(3)                                                                      | 11.1680(8)                                                      |                                                                                |
| <i>b</i> (Å)                                  | 33.2337(12)                                                   | 11.3248(2)                                                                     | 13.5663(5)                                            | 11.394(5)                                         | 9.7384(5)                                                        | 12.877(5)                                                        | 9.6883(8)                                                       | 15.3166(4)                                                                     | 25.2917(18)                                                     |                                                                                |
| <i>c</i> (Å)                                  | 12.3547(4)                                                    | 29.2277(4)                                                                     | 27.2835(13)                                           | 14.313(5)                                         | 12.1390(5)                                                       | 17.325(5)                                                        | 13.9491(13)                                                     | 8.7169(4)                                                                      | 21.2081(19)                                                     |                                                                                |
| $\alpha$ (°)                                  | 90                                                            | 90                                                                             | 90                                                    | 90                                                | 90                                                               | 90                                                               | 76.153(8)                                                       | 90                                                                             | 90                                                              |                                                                                |
| $\beta$ (°)                                   | 90                                                            | 98.689(1)                                                                      | 89.922(5)                                             | 90                                                | 90.252(4)                                                        | 90                                                               | 73.459(8)                                                       | 112.728(5)                                                                     | 96.363(7)                                                       |                                                                                |
| $\gamma$ (°)                                  | 90                                                            | 90                                                                             | 90                                                    | 90                                                | 90                                                               | 90                                                               | 84.233(7)                                                       | 90                                                                             | 90                                                              |                                                                                |
| <i>V</i> (Å <sup>3</sup> )                    | 4168.4(2)                                                     | 4039.50(11)                                                                    | 4291.0(3)                                             | 1827.0(13)                                        | 1305.44(11)                                                      | 1757.5(14)                                                       | 1141.17(18)                                                     | 954.80(7)                                                                      | 5953.5(8)                                                       |                                                                                |
| <i>Z</i>                                      | 4                                                             | 4                                                                              | 4                                                     | 4                                                 | 4                                                                | 4                                                                | 1                                                               | 2                                                                              | 4                                                               |                                                                                |
| <i>D<sub>c</sub></i> (g cm <sup>-3</sup> )    | 1.148                                                         | 1.446                                                                          | 1.339                                                 | 1.198                                             | 1.631                                                            | 1.280                                                            | 1.519                                                           | 1.538                                                                          | 1.496                                                           |                                                                                |
| $\mu$ (mm <sup>-1</sup> )                     | 8.546                                                         | 8.131                                                                          | 7.628                                                 | 1.359                                             | 1.905                                                            | 2.124                                                            | 1.946                                                           | 7.428                                                                          | 1.921                                                           |                                                                                |
| F(000)                                        | 1392                                                          | 1788                                                                           | 1750                                                  | 672                                               | 652                                                              | 684                                                              | 540                                                             | 454                                                                            | 2748                                                            |                                                                                |
| Refls collected                               | 11467                                                         | 15902                                                                          | 28319                                                 | 7256                                              | 7436                                                             | 3968                                                             | 7215                                                            | 5627                                                                           | 11010                                                           |                                                                                |
| Unique refls                                  | 3050                                                          | 7822                                                                           | 8198                                                  | 3211                                              | 2304                                                             | 2623                                                             | 4055                                                            | 2197                                                                           | 5731                                                            |                                                                                |
| <i>R</i> <sub>int</sub>                       | 0.034                                                         | 0.036                                                                          | 0.085                                                 | 0.034                                             | 0.036                                                            | 0.029                                                            | 0.027                                                           | 0.040                                                                          | 0.023                                                           |                                                                                |
| <i>R</i> <sub>1</sub>                         | 0.0198                                                        | 0.0393                                                                         | 0.0897                                                | 0.0315                                            | 0.0439                                                           | 0.0485                                                           | 0.0305                                                          | 0.0374                                                                         | 0.0350                                                          |                                                                                |
| <i>wR</i> <sub>2</sub>                        | 0.0512                                                        | 0.1073                                                                         | 0.3064                                                | 0.0756                                            | 0.1232                                                           | 0.1394                                                           | 0.0840                                                          | 0.0916                                                                         | 0.0971                                                          |                                                                                |
| GOF                                           | 1.015                                                         | 1.028                                                                          | 1.122                                                 | 1.052                                             | 1.078                                                            | 1.083                                                            | 0.898                                                           | 1.034                                                                          | 1.038                                                           |                                                                                |
| $\Delta\rho_{\min/\max}$ (e Å <sup>-3</sup> ) | -0.33, 0.35                                                   | -0.52, 0.89                                                                    | -1.61, 0.91                                           | -0.27, 0.62                                       | -1.25, 0.91                                                      | -0.63, 1.12                                                      | -0.44, 0.34                                                     | -0.48, 0.55                                                                    | -0.46, 1.02                                                     |                                                                                |

**Table S2** Selected bond distances (Å) and angles (°) for  $[(\text{CH}_3)_2\text{NH}_2][\text{Cd}_2(\text{PDC})_3]_n \cdot 4n\text{DMF} \cdot 6n\text{H}_2\text{O}$ , [1].

|                         |            |                         |            |
|-------------------------|------------|-------------------------|------------|
| <i>Bond distances</i>   |            |                         |            |
| Cd(1) – O(3)            | 2.224(6)   | Cd(1) – O(7)            | 2.538(3)   |
| Cd(1) – O(8)            | 2.341(3)   | Cd(1) – N(1)            | 2.362(5)   |
| Cd(1) – O(3)_d          | 2.224(6)   | Cd(1) – O(7)_d          | 2.538(3)   |
| Cd(1) – O(8)_d          | 2.341(3)   | Cd(1) – N(3)_h          | 2.359(5)   |
| Cd(2) – N(2)            | 2.302(8)   | Cd(2) – O(5)_a          | 2.371(5)   |
| Cd(2) – O(6)_a          | 2.331(7)   | Cd(2) – N(2)_d          | 2.302(8)   |
| Cd(2) – O(5)_e          | 2.371(5)   | Cd(2) – O(6)_e          | 2.331(6)   |
| Cd(2) – O(1)_h          | 2.261(3)   | Cd(2) – O(2)_h          | 2.532(3)   |
| Cd(2) – O(1)_l          | 2.261(3)   | Cd(2) – O(2)_l          | 2.532(3)   |
| <i>Bond angles</i>      |            |                         |            |
| O(3) – Cd(1) – O(7)     | 85.9(5)    | O(3)_d – Cd(1) – N(3)_h | 81.4(2)    |
| O(3) – Cd(1) – O(8)     | 97.8(4)    | O(7)_d – Cd(1) – O(8)_d | 53.35(14)  |
| O(3) – Cd(1) – N(1)     | 165.5(3)   | O(7)_d – Cd(1) – N(3)_h | 86.27(11)  |
| O(3) – Cd(1) – O(3)_d   | 10.2(7)    | O(8)_d – Cd(1) – N(3)_h | 139.39(8)  |
| O(3) – Cd(1) – O(7)_d   | 96.1(5)    | O(5)_a – Cd(2) – N(2)   | 89.3(2)    |
| O(3) – Cd(1) – O(8)_d   | 104.5(3)   | O(6)_a – Cd(2) – N(2)   | 143.8(2)   |
| O(3) – Cd(1) – N(3)_h   | 81.4(2)    | N(2) – Cd(2) – N(2)_d   | 8.1(11)    |
| O(7) – Cd(1) – O(8)     | 53.35(14)  | O(5)_e – Cd(2) – N(2)   | 88.6(2)    |
| O(7) – Cd(1) – N(1)     | 88.14(7)   | O(6)_e – Cd(2) – N(2)   | 142.9(3)   |
| O(3)_d – Cd(1) – O(7)   | 96.1(5)    | O(1)_h – Cd(2) – N(2)   | 96.4(5)    |
| O(7) – Cd(1) – O(7)_d   | 171.92(14) | O(2)_h – Cd(2) – N(2)   | 84.6(8)    |
| O(7) – Cd(1) – O(8)_d   | 133.75(14) | O(1)_l – Cd(2) – N(2)   | 101.9(5)   |
| O(7) – Cd(1) – N(3)_h   | 86.27(11)  | O(2)_l – Cd(2) – N(2)   | 92.6(8)    |
| O(8) – Cd(1) – N(1)     | 89.16(12)  | O(5)_a – Cd(2) – O(6)_a | 54.6(2)    |
| O(3)_d – Cd(1) – O(8)   | 104.5(3)   | O(5)_a – Cd(2) – N(2)_d | 88.6(2)    |
| O(7)_d – Cd(1) – O(8)   | 133.75(14) | O(5)_a – Cd(2) – O(5)_e | 9.3(7)     |
| O(8) – Cd(1) – O(8)_d   | 80.46(12)  | O(5)_a – Cd(2) – O(6)_e | 55.3(3)    |
| O(8) – Cd(1) – N(3)_h   | 139.39(8)  | O(1)_h – Cd(2) – O(5)_a | 140.8(5)   |
| O(3)_d – Cd(1) – N(1)   | 165.5(3)   | O(2)_h – Cd(2) – O(5)_a | 88.8(5)    |
| O(7)_d – Cd(1) – N(1)   | 88.14(7)   | O(1)_l – Cd(2) – O(5)_a | 131.7(5)   |
| O(8)_d – Cd(1) – N(1)   | 89.16(12)  | O(2)_l – Cd(2) – O(5)_a | 79.5(5)    |
| N(1) – Cd(1) – N(3)_h   | 84.98(17)  | O(6)_a – Cd(2) – N(2)_d | 142.9(4)   |
| O(3)_d – Cd(1) – O(7)_d | 85.9(5)    | O(5)_e – Cd(2) – O(6)_a | 55.3(3)    |
| O(3)_d – Cd(1) – O(8)_d | 97.8(4)    | O(1)_l – Cd(2) – O(2)_l | 53.52(11)  |
| O(6)_a – Cd(2) – O(6)_e | 7.5(18)    | O(2)_h – Cd(2) – O(5)_e | 79.5(5)    |
| O(1)_h – Cd(2) – O(6)_a | 110.0(9)   | O(1)_l – Cd(2) – O(5)_e | 105.9(5)   |
| O(2)_h – Cd(2) – O(6)_a | 91.4(12)   | O(2)_l – Cd(2) – O(5)_e | 88.8(5)    |
| O(1)_l – Cd(2) – O(6)_a | 104.7(9)   | O(1)_h – Cd(2) – O(6)_e | 104.7(9)   |
| O(2)_l – Cd(2) – O(6)_a | 84.0(12)   | O(2)_h – Cd(2) – O(6)_e | 84.0(12)   |
| O(5)_e – Cd(2) – N(2)_d | 89.3(2)    | O(1)_l – Cd(2) – O(6)_e | 110.0(9)   |
| O(6)_e – Cd(2) – N(2)_d | 143.8(2)   | O(2)_l – Cd(2) – O(6)_e | 91.4(12)   |
| O(1)_h – Cd(2) – N(2)_d | 101.9(5)   | O(1)_h – Cd(2) – O(2)_h | 53.52(11)  |
| O(2)_h – Cd(2) – N(2)_d | 92.6(8)    | O(1)_h – Cd(2) – O(1)_l | 84.97(11)  |
| O(1)_l – Cd(2) – N(2)_d | 96.4(5)    | O(1)_h – Cd(2) – O(2)_l | 138.49(11) |
| O(2)_l – Cd(2) – N(2)_d | 84.6(8)    | O(1)_l – Cd(2) – O(2)_h | 138.49(11) |
| O(5)_e – Cd(2) – O(6)_e | 54.6(2)    | O(2)_h – Cd(2) – O(2)_l | 167.99(12) |
| O(1)_h – Cd(2) – O(5)_e | 131.7(5)   |                         |            |

Translation of Symmetry Code to Equivalent Positions: a = -x,1-y,-1/2+z, b = -x,1-y,1/2+z, c = -1-x,y,z, d = -x,y,z, e = x,1-y,-1/2+z, f = x,1-y,1/2+z, g = 1/2+x,-1/2+y,z, h = -1/2-x,1/2-y,-1/2+z, i = -1/2-x,1/2-y,1/2+z, j = 1/2-x,-1/2+y,z, k = -1/2+x,1/2-y,1/2+z, l = 1/2+x,1/2-y,-1/2+z.



**Table S3** Selected bond distances (Å) and angles (°) for [Mn(PDC)(DMF)]<sub>n</sub> [2]

|                          |            |                          |            |
|--------------------------|------------|--------------------------|------------|
| <i>Bond distances</i>    |            |                          |            |
| Mn(1) – O(3S)            | 2.154(14)  | Mn(2) – O(10)_a          | 2.1247(18) |
| Mn(1) – O(7)             | 2.2670(18) | Mn(2) – O(3)_d           | 2.1806(19) |
| Mn(1) – O(8)             | 2.2922(18) | Mn(2) – O(6)_e           | 2.1412(19) |
| Mn(1) – O(12)            | 2.0933(18) | Mn(3) – O(1)             | 2.1193(19) |
| Mn(1) – O(3S)            | 2.164(17)  | Mn(3) – O(1S)            | 2.1891(19) |
| Mn(1) – N(3)_b           | 2.264(2)   | Mn(3) – O(2S)            | 2.223(2)   |
| Mn(1) – O(4)_d           | 2.1585(19) | Mn(3) – O(9)_a           | 2.1904(18) |
| Mn(2) – O(2)             | 2.1388(19) | Mn(3) – N(1)_c           | 2.305(2)   |
| Mn(2) – O(8)             | 2.2836(19) | Mn(3) – O(5)_e           | 2.1491(19) |
| Mn(2) – O(11)            | 2.1581(19) |                          |            |
| <i>Bond angles</i>       |            |                          |            |
| O(3S)_1 – Mn(1) – O(7)   | 88.8(3)    | O(8) – Mn(2) – O(11)     | 83.68(7)   |
| O(3S)_1 – Mn(1) – O(8)   | 103.8(4)   | O(8) – Mn(2) – O(10)_a   | 87.53(7)   |
| O(3S)_1 – Mn(1) – O(12)  | 88.6(3)    | O(3)_d – Mn(2) – O(8)    | 97.48(7)   |
| O(3S)_1 – Mn(1) – N(3)_b | 87.4(4)    | O(6)_e – Mn(2) – O(8)    | 87.76(7)   |
| O(3S)_1 – Mn(1) – O(4)_d | 163.2(4)   | O(10)_a – Mn(2) – O(11)  | 90.43(7)   |
| O(7) – Mn(1) – O(8)      | 57.89(6)   | O(3)_d – Mn(2) – O(11)   | 90.88(7)   |
| O(7) – Mn(1) – O(12)     | 156.30(7)  | O(6)_e – Mn(2) – O(11)   | 168.31(7)  |
| O(3S)_2 – Mn(1) – O(7)   | 84.5(5)    | O(3)_d – Mn(2) – O(10)_a | 174.93(7)  |
| O(7) – Mn(1) – N(3)_b    | 113.04(7)  | O(6)_e – Mn(2) – O(10)_a | 97.16(7)   |
| O(4)_d – Mn(1) – O(7)    | 84.49(7)   | O(3)_d – Mn(2) – O(6)_e  | 82.34(7)   |
| O(8) – Mn(1) – O(12)     | 100.04(7)  | O(1) – Mn(3) – O(1S)     | 170.21(8)  |
| O(3S)_2 – Mn(1) – O(8)   | 96.5(5)    | O(1) – Mn(3) – O(2S)     | 87.13(8)   |
| O(8) – Mn(1) – N(3)_b    | 164.76(7)  | O(1) – Mn(3) – O(9)_a    | 90.22(7)   |
| O(4)_d – Mn(1) – O(8)    | 85.64(7)   | O(1) – Mn(3) – N(1)_c    | 86.39(8)   |
| O(3S)_2 – Mn(1) – O(12)  | 90.2(5)    | O(1) – Mn(3) – O(5)_e    | 105.68(7)  |
| O(12) – Mn(1) – N(3)_b   | 90.37(7)   | O(1S) – Mn(3) – O(2S)    | 97.08(8)   |
| O(4)_d – Mn(1) – O(12)   | 103.65(7)  | O(1S) – Mn(3) – O(9)_a   | 85.88(7)   |
| O(3S)_2 – Mn(1) – N(3)_b | 94.6(5)    | O(1S) – Mn(3) – N(1)_c   | 84.80(7)   |
| O(3S)_2 – Mn(1) – O(4)_d | 165.5(5)   | O(1S) – Mn(3) – O(5)_e   | 83.57(7)   |
| O(4)_d – Mn(1) – N(3)_b  | 81.06(8)   | O(2S) – Mn(3) – O(9)_a   | 176.58(8)  |
| O(2) – Mn(2) – O(8)      | 168.89(7)  | O(2S) – Mn(3) – N(1)_c   | 89.71(8)   |
| O(2) – Mn(2) – O(11)     | 85.26(7)   | O(2S) – Mn(3) – O(5)_e   | 84.91(8)   |
| O(2) – Mn(2) – O(10)_a   | 93.63(7)   | O(9)_a – Mn(3) – N(1)_c  | 92.26(7)   |
| O(2) – Mn(2) – O(3)_d    | 81.61(7)   | O(5)_e – Mn(3) – O(9)_a  | 93.76(7)   |
| O(2) – Mn(2) – O(6)_e    | 103.04(7)  | O(5)_e – Mn(3) – N(1)_c  | 166.47(8)  |

Translation of Symmetry Code to Equivalent Positions: a = 1/2-x, -1/2+y, 3/2-z, b = 1/2-x, 1/2+y, 3/2-z, c = 3/2-x, -1/2+y, 3/2-z, d = 3/2-x, 1/2+y, 3/2-z, e = 1-x, 1-y, 1-z.

**Table S4** Selected bond distances (Å) and angles (°) for [Mn<sub>3</sub>(PDC)<sub>2</sub>(INA)<sub>2</sub>(DMF)<sub>1.5</sub>(H<sub>2</sub>O)<sub>0.5</sub>]<sub>n</sub>·nDMF·2nH<sub>2</sub>O, [3].

|                         |           |                          |           |
|-------------------------|-----------|--------------------------|-----------|
| <i>Bond distances</i>   |           |                          |           |
| Mn(1) – O(1)            | 2.133(9)  | Mn(2) – O(3)_e           | 2.115(11) |
| Mn(1) – O(2S)           | 2.211(8)  | Mn(2) – O(5)_g           | 2.181(8)  |
| Mn(1) – N(4)            | 2.363(9)  | Mn(2) – O(12)_h          | 2.137(9)  |
| Mn(1) – N(3)_b          | 2.325(12) | Mn(3) – O(1S)            | 2.196(8)  |
| Mn(1) – O(4)_e          | 2.161(8)  | Mn(3) – O(10)            | 2.170(7)  |
| Mn(1) – O(6)_g          | 2.137(10) | Mn(3) – N(2)             | 2.275(9)  |
| Mn(2) – O(2)            | 2.146(8)  | Mn(3) – O(7)_c           | 2.137(9)  |
| Mn(2) – O(9)            | 2.117(10) | Mn(3) – N(1)_c           | 2.320(12) |
| Mn(2) – O(8)_c          | 2.184(8)  | Mn(3) – O(11)_h          | 2.133(10) |
| <i>Bond angles</i>      |           |                          |           |
| O(1) – Mn(1) – O(2S)    | 90.7(4)   | O(9) – Mn(2) – O(12)_h   | 108.4(4)  |
| O(1) – Mn(1) – N(4)     | 178.1(4)  | O(3)_e – Mn(2) – O(8)_c  | 80.2(4)   |
| O(1) – Mn(1) – N(3)_b   | 91.3(4)   | O(5)_g – Mn(2) – O(8)_c  | 165.9(4)  |
| O(1) – Mn(1) – O(4)_e   | 100.8(3)  | O(8)_c – Mn(2) – O(12)_h | 94.7(3)   |
| O(1) – Mn(1) – O(6)_g   | 100.4(4)  | O(3)_e – Mn(2) – O(5)_g  | 112.9(4)  |
| O(2S) – Mn(1) – N(4)    | 88.2(4)   | O(3)_e – Mn(2) – O(12)_h | 87.7(5)   |
| O(2S) – Mn(1) – N(3)_b  | 84.9(4)   | O(5)_g – Mn(2) – O(12)_h | 81.2(3)   |
| O(2S) – Mn(1) – O(4)_e  | 164.1(4)  | O(1S) – Mn(3) – O(10)    | 167.0(4)  |
| O(2S) – Mn(1) – O(6)_g  | 88.0(4)   | O(1S) – Mn(3) – N(2)     | 84.9(3)   |
| N(3)_b – Mn(1) – N(4)   | 87.1(4)   | O(1S) – Mn(3) – O(7)_c   | 85.8(3)   |
| O(4)_e – Mn(1) – N(4)   | 80.1(3)   | O(1S) – Mn(3) – N(1)_c   | 84.0(4)   |
| O(6)_g – Mn(1) – N(4)   | 81.1(4)   | O(1S) – Mn(3) – O(11)_h  | 85.1(4)   |
| O(4)_e – Mn(1) – N(3)_b | 83.9(3)   | O(10) – Mn(3) – N(2)     | 85.6(3)   |
| O(6)_g – Mn(1) – N(3)_b | 166.4(4)  | O(7)_c – Mn(3) – O(10)   | 103.1(3)  |
| O(4)_e – Mn(1) – O(6)_g | 100.5(3)  | O(10) – Mn(3) – N(1)_c   | 86.9(3)   |
| O(2) – Mn(2) – O(9)     | 83.9(3)   | O(10) – Mn(3) – O(11)_h  | 103.0(4)  |
| O(2) – Mn(2) – O(8)_c   | 101.4(3)  | O(7)_c – Mn(3) – N(2)    | 170.2(3)  |
| O(2) – Mn(2) – O(3)_e   | 84.3(4)   | N(1)_c – Mn(3) – N(2)    | 88.5(4)   |
| O(2) – Mn(2) – O(5)_g   | 85.7(3)   | O(11)_h – Mn(3) – N(2)   | 85.8(4)   |
| O(2) – Mn(2) – O(12)_h  | 160.5(4)  | O(7)_c – Mn(3) – N(1)_c  | 87.5(4)   |
| O(8)_c – Mn(2) – O(9)   | 86.2(3)   | O(7)_c – Mn(3) – O(11)_h | 96.5(4)   |
| O(3)_e – Mn(2) – O(9)   | 159.8(4)  | O(11)_h – Mn(3) – N(1)_c | 168.1(4)  |
| O(5)_g – Mn(2) – O(9)   | 82.4(4)   |                          |           |

Translation of Symmetry Code to Equivalent Positions: a = -1+x,y,z, b = 1+x,y,z, c = -x,-1/2+y,3/2-z, d = -x,1/2+y,3/2-z, e = 1-x,-1/2+y,3/2-z, f = 1-x,1/2+y,3/2-z, g = -x,-y,1-z, h = 1-x,-y,1-z

**Table S5** Selected bond distances (Å) and angles (°) for [Zn(PDC)(NMP)]<sub>n</sub>·nH<sub>2</sub>O, [4].

|                       |            |                         |            |
|-----------------------|------------|-------------------------|------------|
| <i>Bond distances</i> |            |                         |            |
| Zn(1) – O(1)          | 1.946(3)   | Zn(1) – O(4)_a          | 1.954(3)   |
| Zn(1) – O(5)          | 1.975(3)   | Zn(1) – N(1)_c          | 2.049(3)   |
| <i>Bond angles</i>    |            |                         |            |
| O(1) – Zn(1) – O(5)   | 105.71(13) | O(4)_a – Zn(1) – O(5)   | 119.60(13) |
| O(1) – Zn(1) – O(4)_a | 116.44(12) | O(5) – Zn(1) – N(1)_c   | 94.70(14)  |
| O(1) – Zn(1) – N(1)_c | 121.22(12) | O(4)_a – Zn(1) – N(1)_c | 97.98(14)  |

Translation of Symmetry Code to Equivalent Positions: a = 1/2-x,1-y,-1/2+z, c = -1/2+x,3/2-y,1-z

**Table S6** Selected bond distances (Å) and angles (°) for [Zn(PDC)(H<sub>2</sub>O)(DMF)]<sub>n</sub>, [5].

|                       |            |                         |           |
|-----------------------|------------|-------------------------|-----------|
| <i>Bond distances</i> |            |                         |           |
| Zn(1) – O(1)          | 1.993(3)   | Zn(1) – O(3)_b          | 2.035(3)  |
| Zn(1) – O(5)          | 2.154(3)   | Zn(1) – N(1)_c          | 2.098(4)  |
| Zn(1) – O(6)          | 2.075(3)   |                         |           |
| <i>Bond angles</i>    |            |                         |           |
| O(1) – Zn(1) – O(5)   | 90.82(13)  | O(3)_b – Zn(1) – O(5)   | 92.58(12) |
| O(1) – Zn(1) – O(6)   | 89.92(13)  | O(5) – Zn(1) – N(1)_c   | 87.04(13) |
| O(1) – Zn(1) – O(3)_b | 125.76(11) | O(3)_b – Zn(1) – O(6)   | 91.42(13) |
| O(1) – Zn(1) – N(1)_c | 137.78(11) | O(6) – Zn(1) – N(1)_c   | 88.74(14) |
| O(5) – Zn(1) – O(6)   | 174.49(13) | O(3)_b – Zn(1) – N(1)_c | 96.46(11) |

Translation of Symmetry Code to Equivalent Positions: b = x,1+y,z, c = x,5/2-y,-1/2+z.

**Table S7** Selected bond distances (Å) and angles (°) for [Zn(PDC)(3hmpH)]<sub>n</sub>·nDMF·0.5nH<sub>2</sub>O, [6].

|                       |            |                         |            |
|-----------------------|------------|-------------------------|------------|
| <i>Bond distances</i> |            |                         |            |
| Zn(1) – N(1)          | 2.009(5)   | Zn(1) – O(3)_a          | 2.612(6)   |
| Zn(1) – N(2)          | 2.040(5)   | Zn(1) – O(4)_d          | 1.958(5)   |
| Zn(1) – O(2)_a        | 1.981(4)   |                         |            |
| <i>Bond angles</i>    |            |                         |            |
| N(1) – Zn(1) – N(2)   | 106.4(2)   | O(3)_a – Zn(1) – N(2)   | 155.46(18) |
| O(2)_a – Zn(1) – N(1) | 120.2(2)   | O(4)_d – Zn(1) – N(2)   | 111.09(19) |
| O(3)_a – Zn(1) – N(1) | 81.3(2)    | O(2)_a – Zn(1) – O(3)_a | 55.52(17)  |
| O(4)_d – Zn(1) – N(1) | 114.5(2)   | O(2)_a – Zn(1) – O(4)_d | 102.07(18) |
| O(2)_a – Zn(1) – N(2) | 101.90(19) | O(3)_a – Zn(1) – O(4)_d | 85.34(17)  |

Translation of Symmetry Code to Equivalent Positions: a = -1+x,y,z, d = 2-x,1/2+y,3/2-z.

**Table S8** Selected bond distances (Å) and angles (°) for [Zn(PDC)(2hmpH)<sub>2</sub>]<sub>2</sub>·2DMF, [7].

|                       |            |                       |            |
|-----------------------|------------|-----------------------|------------|
| <i>Bond distances</i> |            |                       |            |
| Zn(1) – O(1)          | 2.1986(16) | Zn(1) – N(1)          | 2.0972(18) |
| Zn(1) – O(2)          | 2.2697(16) | Zn(1) – N(2)          | 2.0888(17) |
| Zn(1) – O(3)          | 2.0711(14) | Zn(1) – O(5)_a        | 2.0406(15) |
| <i>Bond angles</i>    |            |                       |            |
| O(1) – Zn(1) – O(2)   | 91.54(6)   | O(2) – Zn(1) – O(5)_a | 92.58(6)   |
| O(1) – Zn(1) – O(3)   | 88.40(6)   | O(3) – Zn(1) – N(1)   | 102.78(6)  |
| O(1) – Zn(1) – N(1)   | 77.67(6)   | O(3) – Zn(1) – N(2)   | 95.01(6)   |
| O(1) – Zn(1) – N(2)   | 92.35(6)   | O(3) – Zn(1) – O(5)_a | 88.98(6)   |
| O(1) – Zn(1) – O(5)_a | 169.90(6)  | N(1) – Zn(1) – N(2)   | 159.22(6)  |
| O(2) – Zn(1) – O(3)   | 170.96(6)  | O(5)_a – Zn(1) – N(1) | 93.42(7)   |
| O(2) – Zn(1) – N(1)   | 86.02(6)   | O(5)_a – Zn(1) – N(2) | 97.60(6)   |
| O(2) – Zn(1) – N(2)   | 75.96(6)   |                       |            |

Translation of Symmetry Code to Equivalent Positions: a = -x,1-y,2-z

**Table S9** Selected bond distances (Å) and angles (°) for [Co(PDC)(3hmpH)<sub>2</sub>]<sub>n</sub>·0.25nDMF, [8].

|                       |            |                         |            |
|-----------------------|------------|-------------------------|------------|
| <i>Bond distances</i> |            |                         |            |
| Co(1) – N(1)          | 2.121(3)   | Co(1) – O(3)_a          | 2.163(3)   |
| Co(1) – N(2)          | 2.158(3)   | Co(1) – O(4)_a          | 2.214(3)   |
| Co(1) – N(3)          | 2.149(3)   | Co(1) – O(2)_d          | 2.037(3)   |
| <i>Bond angles</i>    |            |                         |            |
| N(1) – Co(1) – N(2)   | 94.33(14)  | O(2)_d – Co(1) – N(2)   | 86.16(15)  |
| N(1) – Co(1) – N(3)   | 94.23(14)  | O(3)_a – Co(1) – N(3)   | 92.16(13)  |
| O(3)_a – Co(1) – N(1) | 90.46(13)  | O(4)_a – Co(1) – N(3)   | 89.36(14)  |
| O(4)_a – Co(1) – N(1) | 150.76(12) | O(2)_d – Co(1) – N(3)   | 87.75(13)  |
| O(2)_d – Co(1) – N(1) | 109.66(13) | O(3)_a – Co(1) – O(4)_a | 60.38(11)  |
| N(2) – Co(1) – N(3)   | 170.79(15) | O(2)_d – Co(1) – O(3)_a | 159.83(13) |
| O(3)_a – Co(1) – N(2) | 91.19(14)  | O(2)_d – Co(1) – O(4)_a | 99.46(12)  |
| O(4)_a – Co(1) – N(2) | 84.84(12)  |                         |            |

Translation of Symmetry Code to Equivalent Positions: a = -1+x,y,z, d = 1-x,1/2+y,1-z

**Table S10** Selected bond distances (Å) and angles (°) for [Cu(PDC)(3hmpH)<sub>2</sub>]<sub>n</sub>·0.5nDMF·1.5nH<sub>2</sub>O, [9].

|                       |            |                         |            |
|-----------------------|------------|-------------------------|------------|
| <i>Bond distances</i> |            |                         |            |
| Cu(1) – O(1)          | 1.9781(14) | Cu(2) – O(5)            | 1.9656(14) |
| Cu(1) – O(3)          | 2.2153(16) | Cu(2) – N(1)            | 2.269(2)   |
| Cu(1) – N(3)          | 2.0112(17) | Cu(2) – N(5)            | 2.0385(17) |
| Cu(1) – N(4)          | 2.0130(18) | Cu(2) – O(5)_a          | 1.9656(14) |
| Cu(1) – O(4)_b        | 1.9551(16) | Cu(2) – N(5)_a          | 2.0385(17) |
| <i>Bond angles</i>    |            |                         |            |
| O(1) – Cu(1) – O(3)   | 87.39(6)   | O(5) – Cu(2) – N(1)     | 86.03(4)   |
| O(1) – Cu(1) – N(3)   | 88.55(6)   | O(5) – Cu(2) – N(5)     | 89.61(6)   |
| O(1) – Cu(1) – N(4)   | 88.44(6)   | O(5) – Cu(2) – O(5)_a   | 172.06(6)  |
| O(1) – Cu(1) – O(4)_b | 156.19(7)  | O(5) – Cu(2) – N(5)_a   | 91.82(6)   |
| O(3) – Cu(1) – N(3)   | 94.90(7)   | N(1) – Cu(2) – N(5)     | 100.36(5)  |
| O(3) – Cu(1) – N(4)   | 90.05(7)   | O(5)_a – Cu(2) – N(1)   | 86.03(4)   |
| O(3) – Cu(1) – O(4)_b | 116.15(6)  | N(1) – Cu(2) – N(5)_a   | 100.36(5)  |
| N(3) – Cu(1) – N(4)   | 174.09(8)  | O(5)_a – Cu(2) – N(5)   | 91.82(6)   |
| O(4)_b – Cu(1) – N(3) | 92.71(7)   | N(5) – Cu(2) – N(5)_a   | 159.29(8)  |
| O(4)_b – Cu(1) – N(4) | 88.01(7)   | O(5)_a – Cu(2) – N(5)_a | 89.61(6)   |

Translation of Symmetry Code to Equivalent Positions: a = 1-x,y,1/2-z, b = -x,-y,-z

**Table S11** Geometrical characteristics (distances in Å and angles in °) of the conventional H-bonds found in [Zn(PDC)(H<sub>2</sub>O)(DMF)]<sub>n</sub>, [5]

| D – H ... A           | D – H   | H ... A | D ... A  | ∠ D – H ... A | Symmetry        |
|-----------------------|---------|---------|----------|---------------|-----------------|
| O(6) – H(6A) ... O(4) | 0.82(4) | 1.88(4) | 2.690(4) | 169(4)        | 1-x,2-y,1-z     |
| O(6) – H(6B) ... O(2) | 0.81(4) | 1.90(4) | 2.703(4) | 169(5)        | 1-x,1/2+y,1/2-z |

**Table S12** Geometrical characteristics (distances in Å and angles in °) of the conventional H-bonds found in [Zn(PDC)(2hmpH)<sub>2</sub>]<sub>2</sub>·2DMF, [7].

| D – H ... A           | D – H   | H ... A | D ... A  | ∠ D – H ... A | Symmetry   |
|-----------------------|---------|---------|----------|---------------|------------|
| O(1) – H(1A) ... O(4) | 0.82(3) | 1.78(3) | 2.586(2) | 170(2)        |            |
| O(2) – H(2A) ... O(6) | 0.82(3) | 1.79(3) | 2.609(2) | 172(5)        | -x,1-y,2-z |

**Table S13** Geometrical characteristics (distances in Å and angles in °) of the conventional H-bonds found in [Co(PDC)(3hmpH)<sub>2</sub>]<sub>n</sub>·0.25nDMF, [8].

| D – H ... A           | D – H   | H ... A | D ... A  | ∠ D – H ... A | Symmetry    |
|-----------------------|---------|---------|----------|---------------|-------------|
| O(6) – H(6) ... O(5)  | 0.82    | 2.05    | 2.801(6) | 153           | x,y,1+z     |
| O(5) – H(7A) ... O(1) | 0.80(2) | 2.38(3) | 2.725(5) | 107(3)        | -x,1/2+y,-z |

**Table S14** Geometrical characteristics (distances in Å and angles in °) of the conventional H-bonds found in [Cu(PDC)(3hmpH)<sub>2</sub>]<sub>n</sub>·0.5nDMF·1.5nH<sub>2</sub>O, [9].

| D – H ... A            | D – H   | H ... A | D ... A  | ∠ D – H ... A | Symmetry       |
|------------------------|---------|---------|----------|---------------|----------------|
| O(7) – H(7A) ... O(6)  | 0.98(3) | 1.68(2) | 2.651(2) | 172(3)        | -1/2+x,1/2+y,z |
| O(8A) – H(8A) ... O(7) | 0.92    | 1.81    | 2.722(4) | 168           | 1+x,y,z        |
| O(9) – H(9A) ... O(2)  | 0.94(4) | 1.76(4) | 2.691(2) | 174(3)        | 1/2+x,-1/2+y,z |

**Table S15** Thermogravimetric analysis (TG) data for the prepared compounds.

| Compound                                                                                                                                                   | Lattice solvent loss (°C)                     |                                    | Coordinated solvent or pyridinealcohol loss (°C) |            | PDC <sup>2-</sup> decomposition (°C) |                   | Final residue reached (°C) (MO) |            |
|------------------------------------------------------------------------------------------------------------------------------------------------------------|-----------------------------------------------|------------------------------------|--------------------------------------------------|------------|--------------------------------------|-------------------|---------------------------------|------------|
|                                                                                                                                                            | Found (%)                                     | Calcd. (%)                         | Found (%)                                        | Calcd. (%) | Found (%)                            | Calcd. (%)        | Found (%)                       | Calcd. (%) |
| [[[(CH <sub>3</sub> ) <sub>2</sub> NH <sub>2</sub> ] <sub>2</sub> [Cd <sub>2</sub> (PDC) <sub>3</sub> ]] <sub>n</sub> ·4nDMF·6nH <sub>2</sub> O, [1]       | 8.5<br>24.5<br>RT – 110, 130-220 <sup>a</sup> | 8.9(H <sub>2</sub> O)<br>24.1(DMF) | 9.5 <sup>b</sup><br>280 – 325                    | 7.6        | 38.1<br>375 – 440                    | 40.8              | 21.2<br>440                     | 22.5       |
| [Mn(PDC)(DMF)] <sub>n</sub> , [2]                                                                                                                          |                                               |                                    | 25.0<br>120 – 300                                | 24.9       | 52.0<br>350 – 470                    | 50.8              | 24.0<br>470                     | 24.2       |
| [Mn <sub>3</sub> (PDC) <sub>2</sub> (INA) <sub>2</sub> (DMF) <sub>1.5</sub> (H <sub>2</sub> O) <sub>0.5</sub> ] <sub>n</sub> ·nDMF·2nH <sub>2</sub> O, [3] | 4.0<br>RT – 110                               | 4.7                                | 18.9<br>140 – 330 <sup>c</sup>                   | 19.0       | 55.0<br>335 – 445 <sup>d</sup>       | 54.5              | 22.9<br>450                     | 22.0       |
| [Zn(PDC)(NMP)] <sub>n</sub> ·nH <sub>2</sub> O, [4]                                                                                                        |                                               |                                    | 35.0<br>RT – 195 <sup>e</sup>                    | 33.7       | 43.0<br>390 – 480                    | 42.9              | 22.5<br>480                     | 23.4       |
| [Zn(PDC)(H <sub>2</sub> O)(DMF)] <sub>n</sub> , [5]                                                                                                        |                                               |                                    | 28.0<br>90 – 240                                 | 28.3       | 46.5<br>400 – 510                    | 46.4              | 25.5<br>510                     | 25.3       |
| [Zn(PDC)(3hmpH)] <sub>n</sub> ·nDMF·0.5nH <sub>2</sub> O, [6]                                                                                              | 19.0<br>30 – 250                              | 19.5                               | 25.0<br>280 – 370                                | 25.9       | 36.9<br>380 – 480                    | 35.5              | 18.1<br>480                     | 19.4       |
| [Zn(PDC)(2hmpH) <sub>2</sub> ] <sub>2</sub> ·2DMF, [7]                                                                                                     | 12.9<br>70 – 150                              | 14.0                               | 40.1<br>180 – 290                                | 41.8       | 28.6<br>355 – 390                    | 30.5              | 15.5<br>420                     | 15.6       |
| [Co(PDC)(3hmpH) <sub>2</sub> ] <sub>n</sub> ·0.25nDMF, [8]                                                                                                 | 3.8<br>RT – 120                               | 4.0                                | 46.1<br>235 – 310                                | 47.4       | 31.0<br>315 – 430                    | 32.4              | 18.0<br>430                     | 16.3       |
| [Cu(PDC)(3hmpH) <sub>2</sub> ] <sub>n</sub> ·0.5nDMF, [9]                                                                                                  | 7.3<br>RT – 205                               | 7.6                                |                                                  |            | 76.0<br>230 – 380                    | 76.0 <sup>f</sup> | 17.0<br>380                     | 16.5       |

<sup>a</sup> H<sub>2</sub>O and DMF were lost in two distinguishable steps.<sup>b</sup> In this case is the decomposition of the cation (CH<sub>3</sub>)<sub>2</sub>NH<sub>2</sub>.<sup>c</sup> The loss of lattice and coordinated DMF is not distinguishable.<sup>d</sup> Both PDC<sup>2-</sup> and INA<sup>-</sup> are decomposed over this temperature range.<sup>e</sup> H<sub>2</sub>O and NMP loss is indistinguishable.<sup>f</sup> This is assigned to the loss (and/or decomposition) of both 3hmpH and pdc<sup>2-</sup>; it is a 4-step procedure but no assignments could be done for the individual steps.

**Table S16.** PDC<sup>2-</sup> 2D coordination polymers with honeycomb topology.

|    | Compound                                               | Lattice dimensions |          |          |          |         |          | Space Group             | Ref. |
|----|--------------------------------------------------------|--------------------|----------|----------|----------|---------|----------|-------------------------|------|
|    |                                                        | <i>a</i>           | <i>b</i> | <i>c</i> | $\alpha$ | $\beta$ | $\gamma$ |                         |      |
| 1  | [Cd(PDC)(H <sub>2</sub> O) <sub>2</sub> ] <sub>n</sub> | 10.21              | 12.32    | 7.53     | 90       | 106.3   | 90       | <i>C2/c</i>             | 53   |
| 2  | [Cd(PDC)(DMA) <sub>2</sub> ] <sub>n</sub>              | 9.29               | 11.97    | 16.35    | 90       | 101.7   | 90       | <i>P2<sub>1</sub></i>   | 54   |
| 3  | [Mn(PDC)(H <sub>2</sub> O) <sub>2</sub> ] <sub>n</sub> | 10.07              | 12.17    | 7.37     | 90       | 106.1   | 90       | <i>C2/c</i>             | 55   |
| 4  | [Zn(PDC)(H <sub>2</sub> O) <sub>2</sub> ] <sub>n</sub> | 10.01              | 11.91    | 7.33     | 90       | 105.1   | 90       | <i>C2/c</i>             | 56   |
| 5  | [Co(PDC)(H <sub>2</sub> O)(py)] <sub>n</sub>           | 10.87              | 9.87     | 11.91    | 90       | 91.5    | 90       | <i>P2<sub>1</sub>/c</i> | 57   |
| 6  | [Co(PDC)(H <sub>2</sub> O) <sub>2</sub> ] <sub>n</sub> | 9.89               | 11.96    | 7.39     | 90       | 105.1   | 90       | <i>C2/c</i>             | 58   |
| 7  | [Cu(PDC)(im) <sub>2</sub> ] <sub>n</sub>               | 15.78              | 12.38    | 7.86     | 90       | 90      | 90       | <i>Pnma</i>             | 59   |
| 8  | [Cu(PDC)(py) <sub>2</sub> ] <sub>n</sub>               | 10.09              | 11.60    | 14.68    | 90       | 93.7    | 90       | <i>P2<sub>1</sub>/n</i> | 60   |
| 9  | [Cu(PDC)(H <sub>2</sub> O) <sub>2</sub> ] <sub>n</sub> | 10.11              | 11.86    | 7.06     | 90       | 105.4   | 90       | <i>C2/c</i>             | 61   |
| 10 | [Fe(PDC)(H <sub>2</sub> O) <sub>2</sub> ] <sub>n</sub> | 9.95               | 12.07    | 7.41     | 90       | 105.9   | 90       | <i>C2/c</i>             | 62   |
| 11 | [Mg(PDC)(H <sub>2</sub> O) <sub>2</sub> ] <sub>n</sub> | 9.24               | 12.07    | 7.28     | 90       | 106.5   | 90       | <i>C2/c</i>             | 63   |
| 12 | [Ca(PDC)(H <sub>2</sub> O) <sub>2</sub> ] <sub>n</sub> | 10.25              | 12.68    | 7.53     | 90       | 106.3   | 90       | <i>Cc</i>               | 64   |
| 13 | [Zn(PDC)(H <sub>2</sub> O)(DMF)] <sub>n</sub>          | 11.04              | 9.74     | 12.14    | 90       | 90.3    | 90       | <i>P2<sub>1</sub>/c</i> | [5]* |
| 14 | [Co(PDC)(3hmpH) <sub>2</sub> ] <sub>n</sub>            | 7.75               | 15.32    | 8.72     | 90       | 112.7   | 90       | <i>P2<sub>1</sub></i>   | [8]* |

\* This work

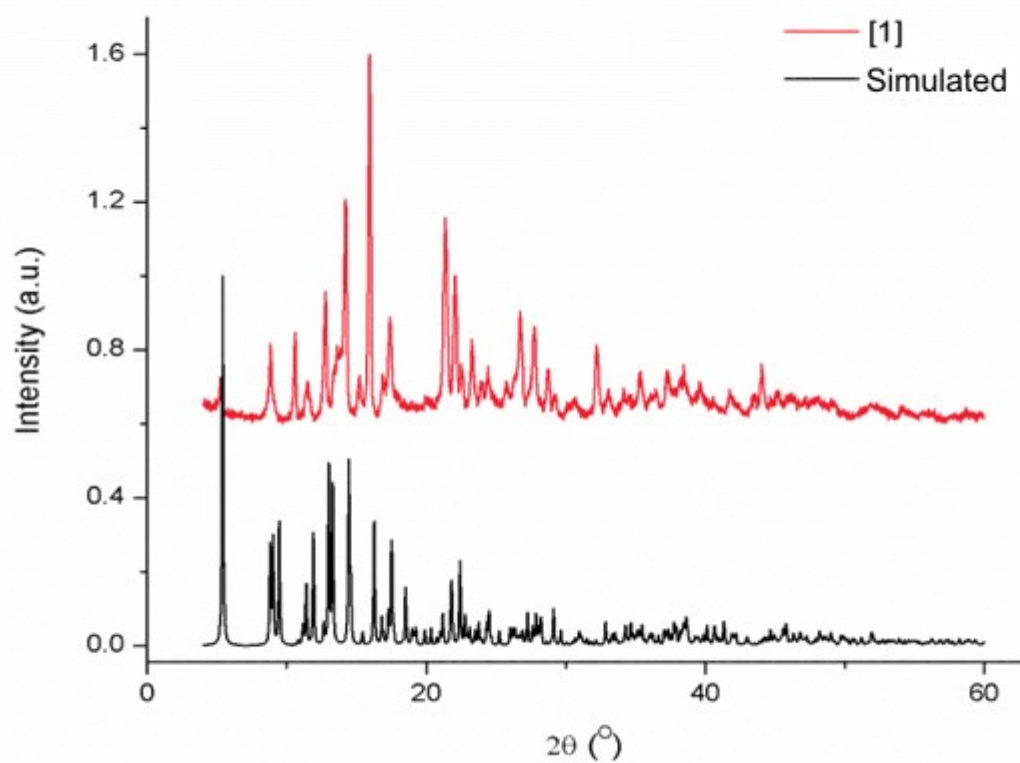

**Fig. S1** The simulated and experimental XRD powder patterns for [1].

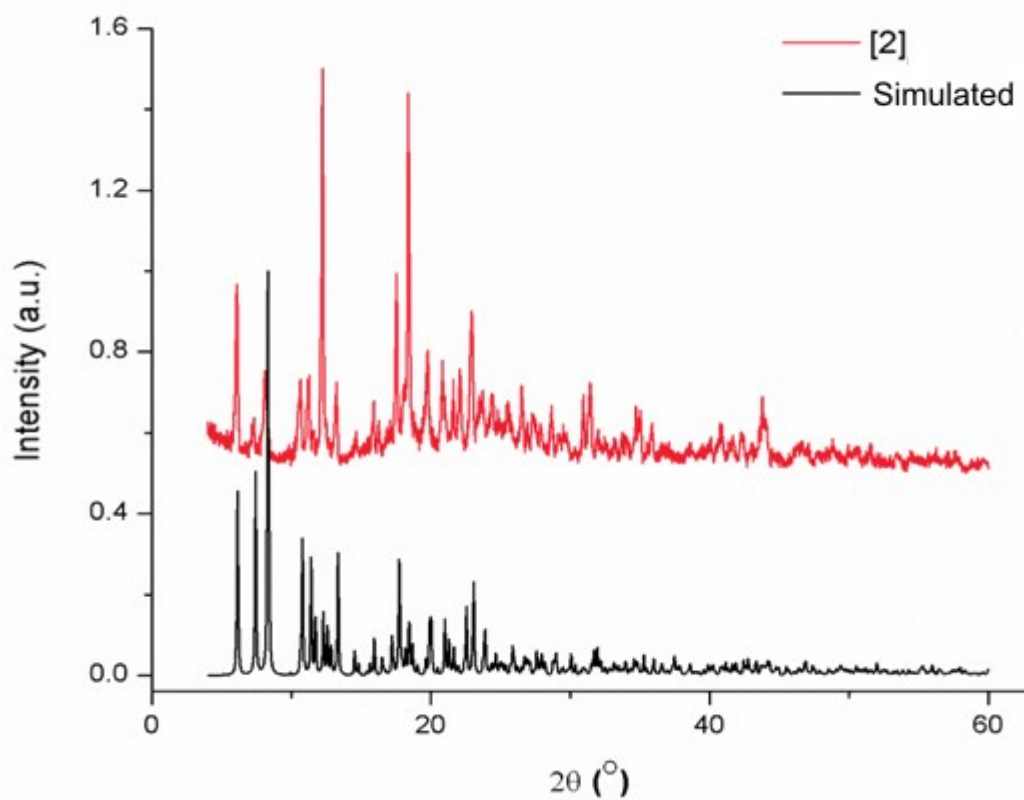

**Fig. S2** The simulated and experimental XRD powder patterns for [2].

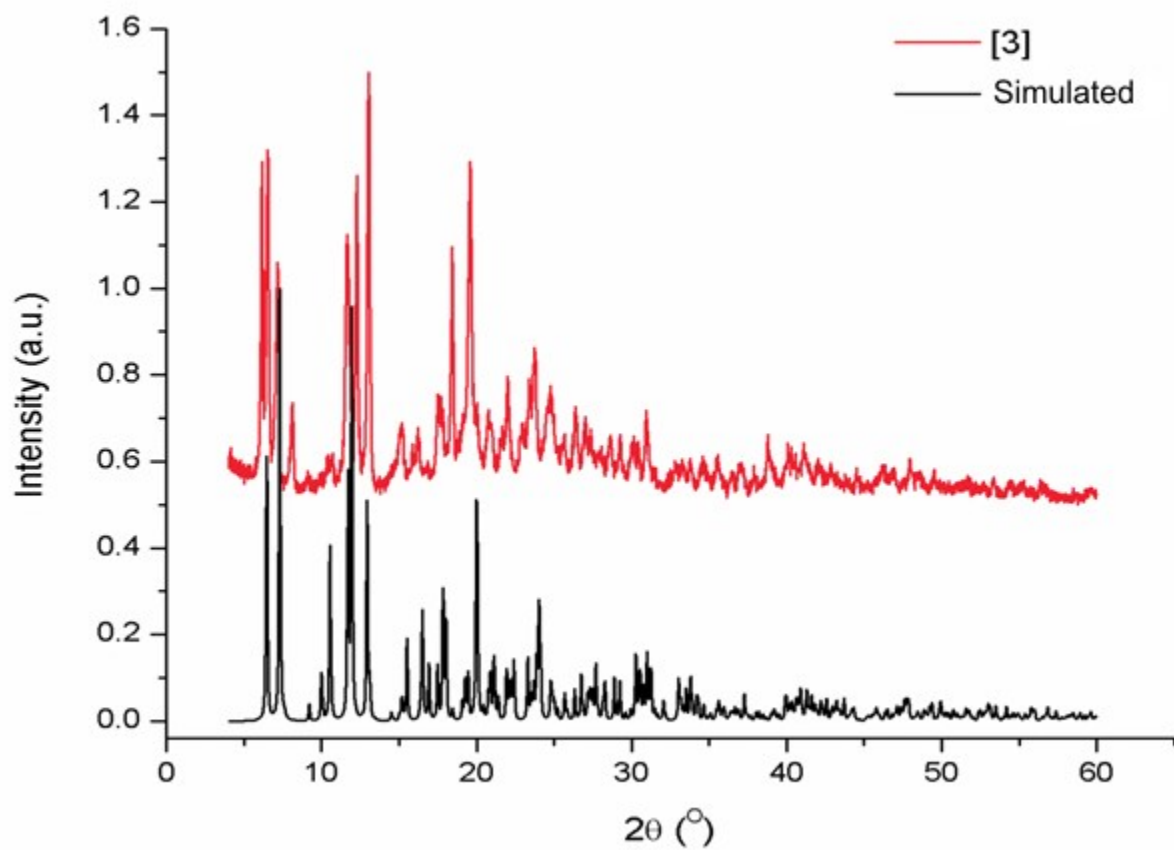

**Fig. S3** The simulated and experimental XRD powder patterns for [3].

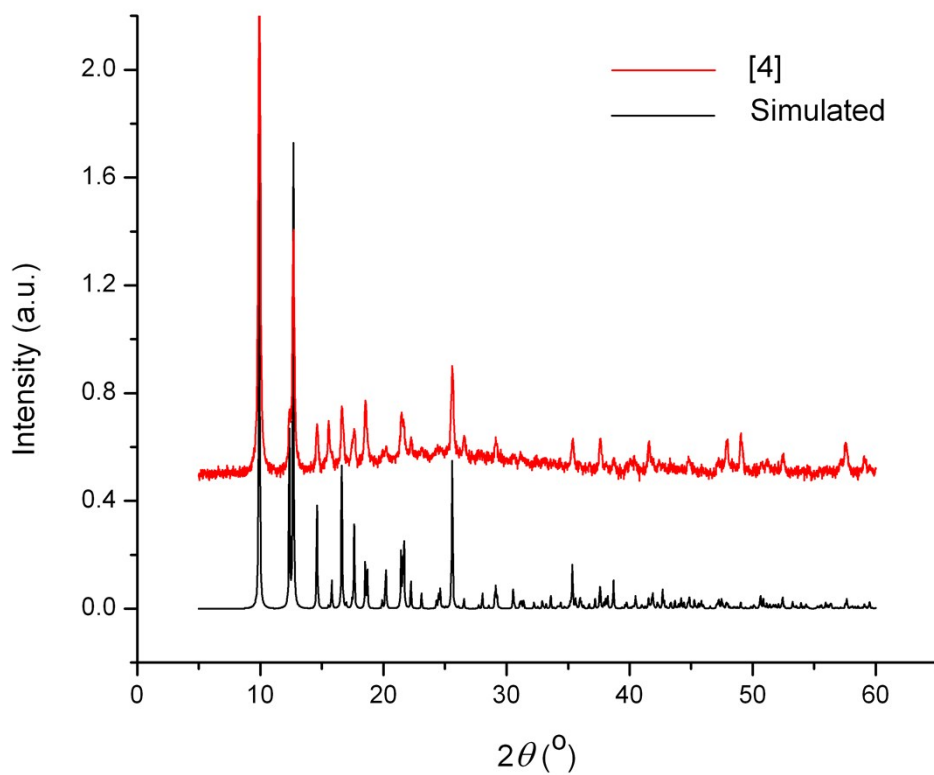

**Fig. S4** The simulated and experimental XRD powder patterns for [4].

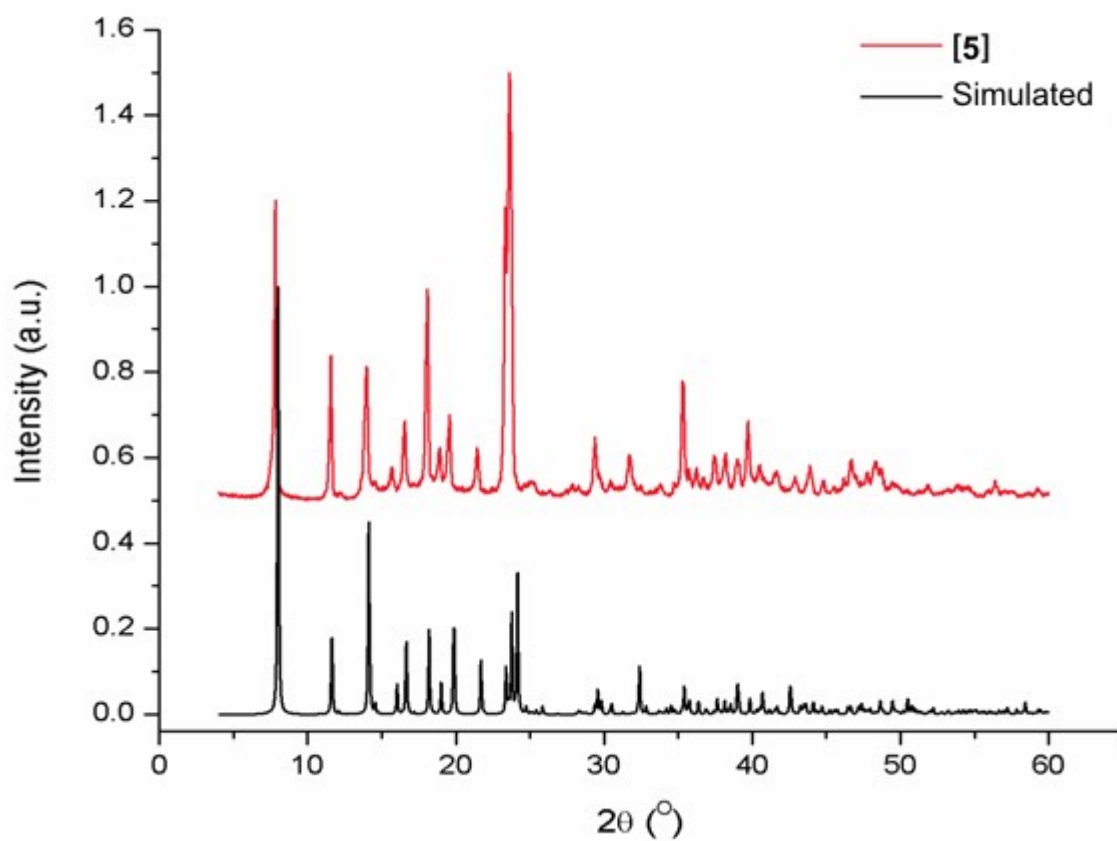

**Fig. S5** The simulated and experimental XRD powder patterns for [5].

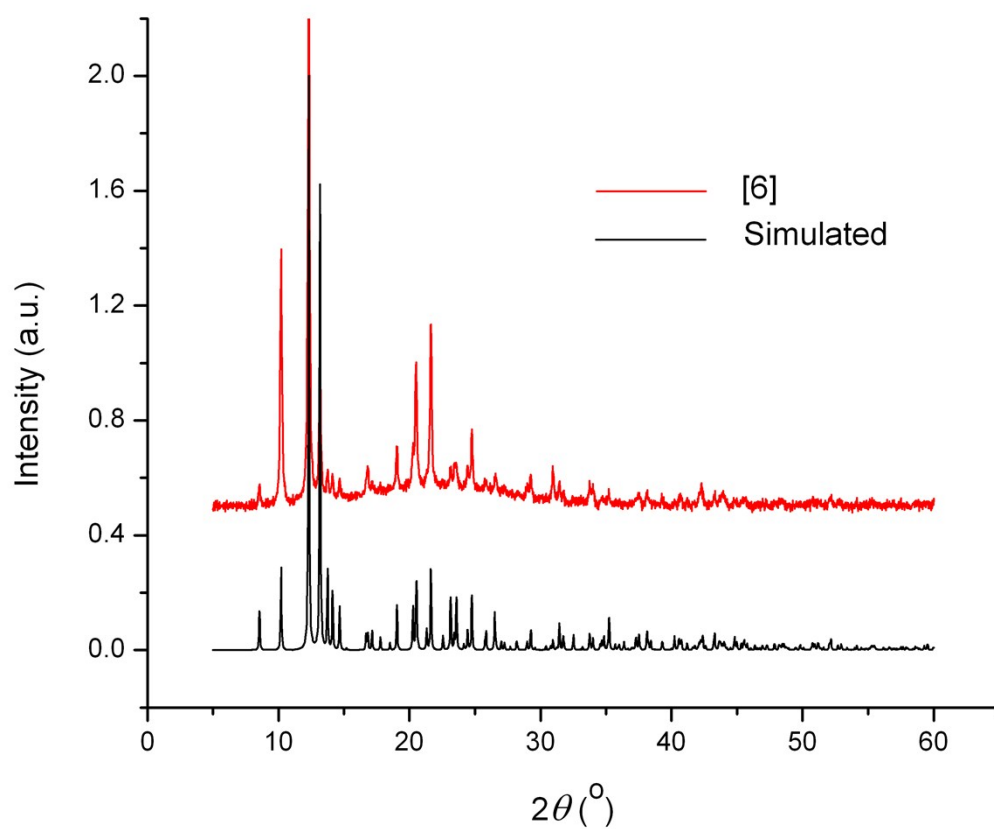

**Fig. S6** The simulated and experimental XRD powder patterns for [6].



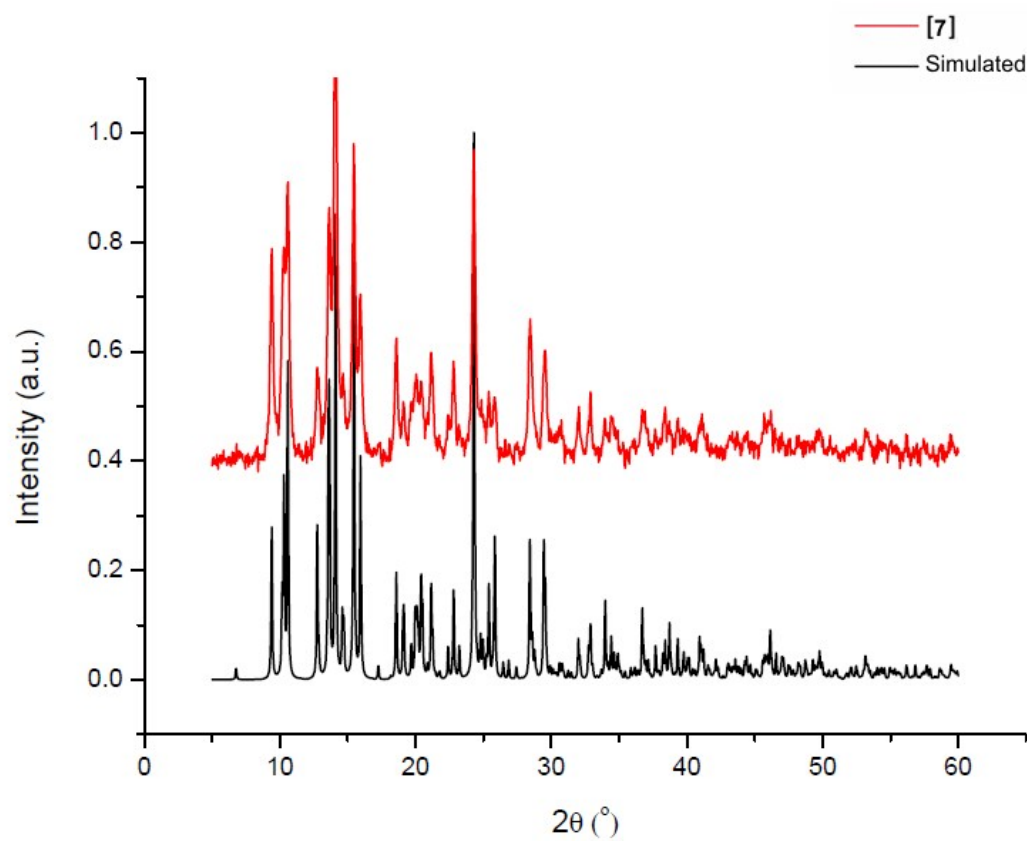

**Fig. S7** The simulated and experimental XRD powder patterns for [7].

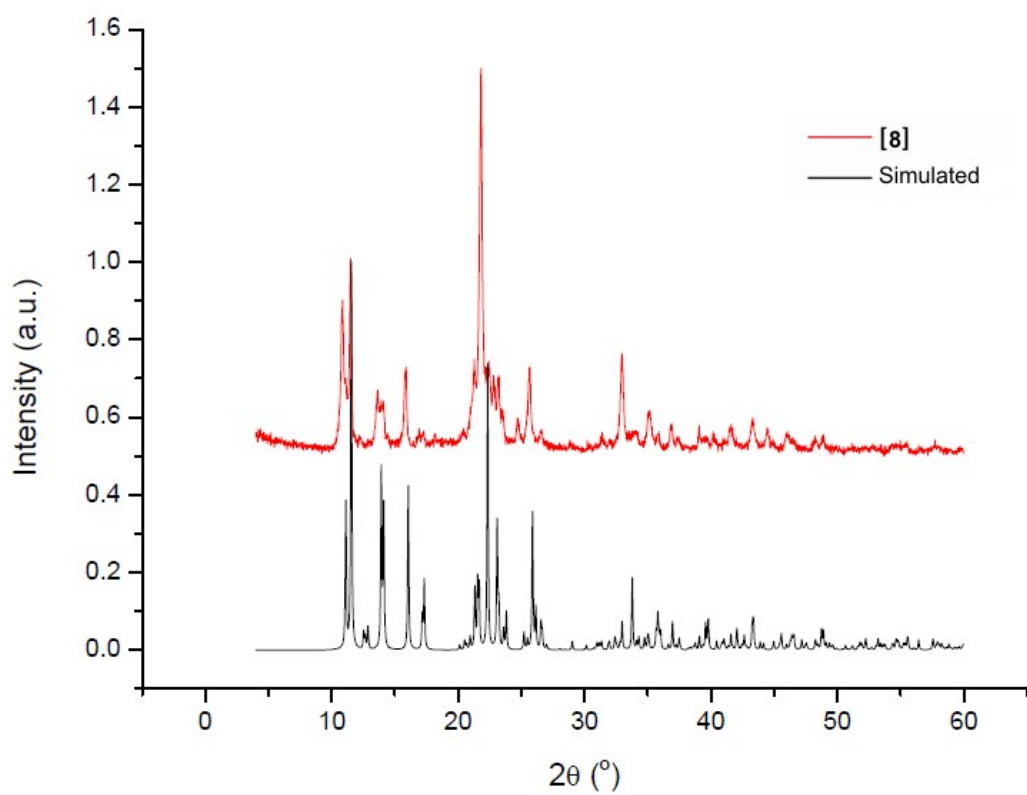

**Fig. S8** The simulated and experimental XRD powder patterns for [8].

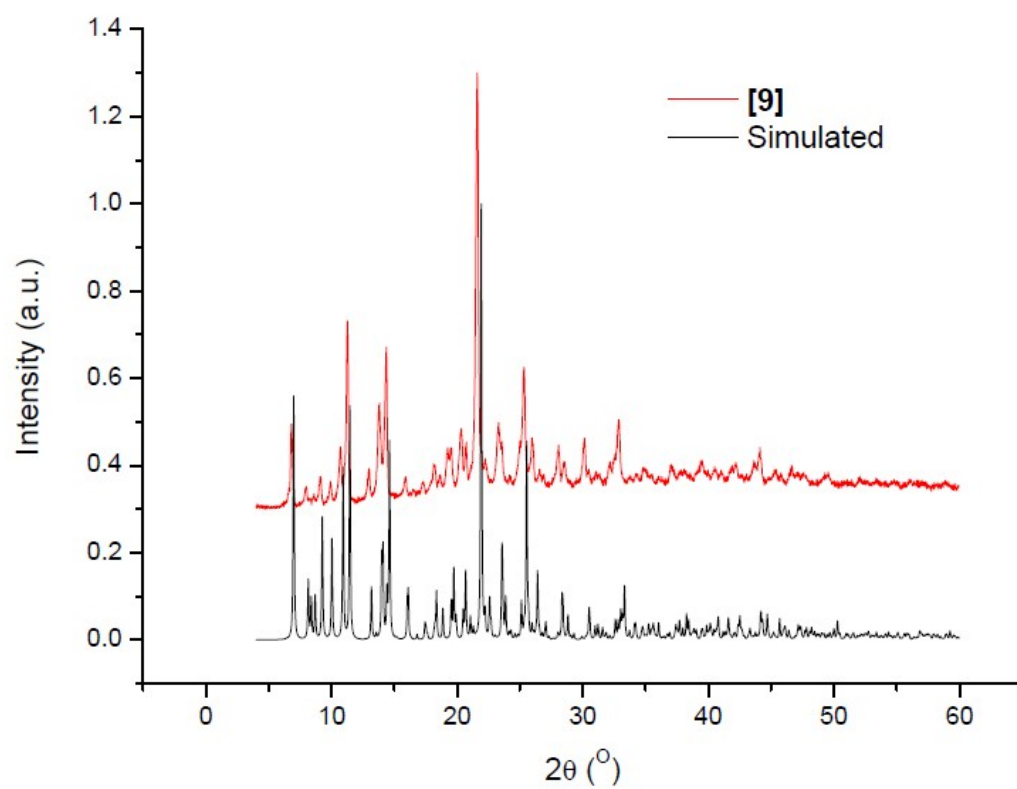

**Fig. S9** The simulated and experimental XRD powder patterns for [9].

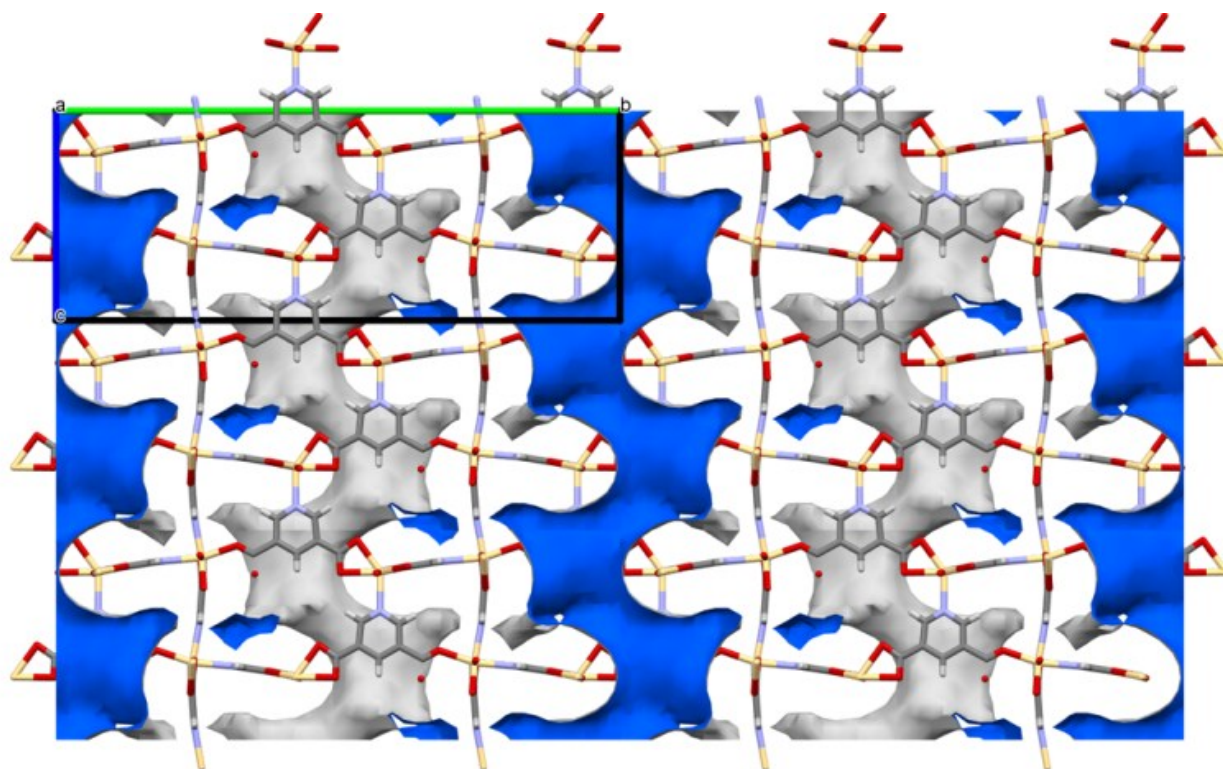

(a)

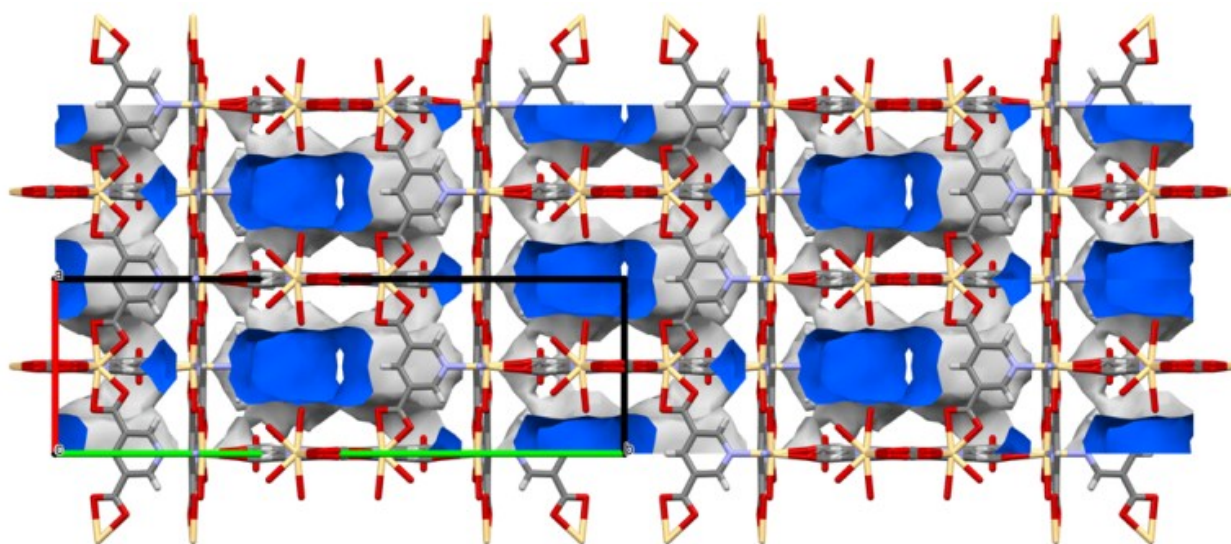

(b)

**Fig. S10** Solvent accessible void space (internal wall is blue) in the anionic network in **[1]** down to *a* (a) and to *c* (b). The diameter of the channels is approximately 7 – 8 Å. This is where the cations and the solvated molecules are accommodated.



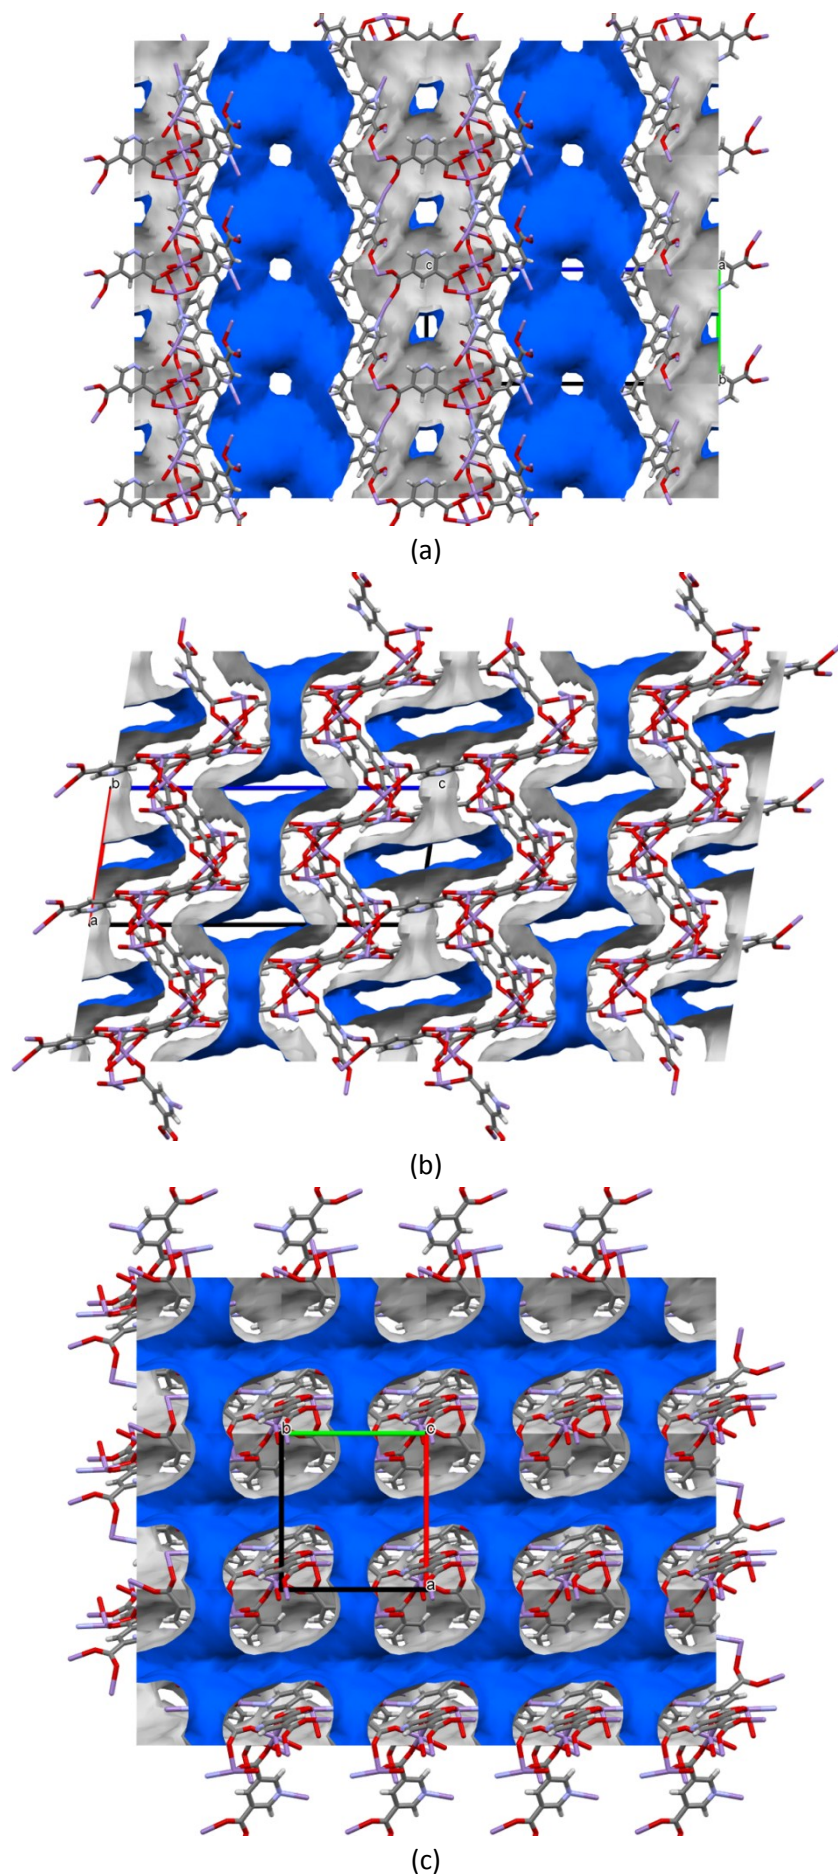

**Fig. S11** Solvent accessible void space in the network in **[2]** after the removal of the coordinated DMF molecules down to *a* (a), *b* (b), and *c* (c). (The internal wall is blue). The parallelogram channels formed have approximate dimensions 9 x 4 Å.

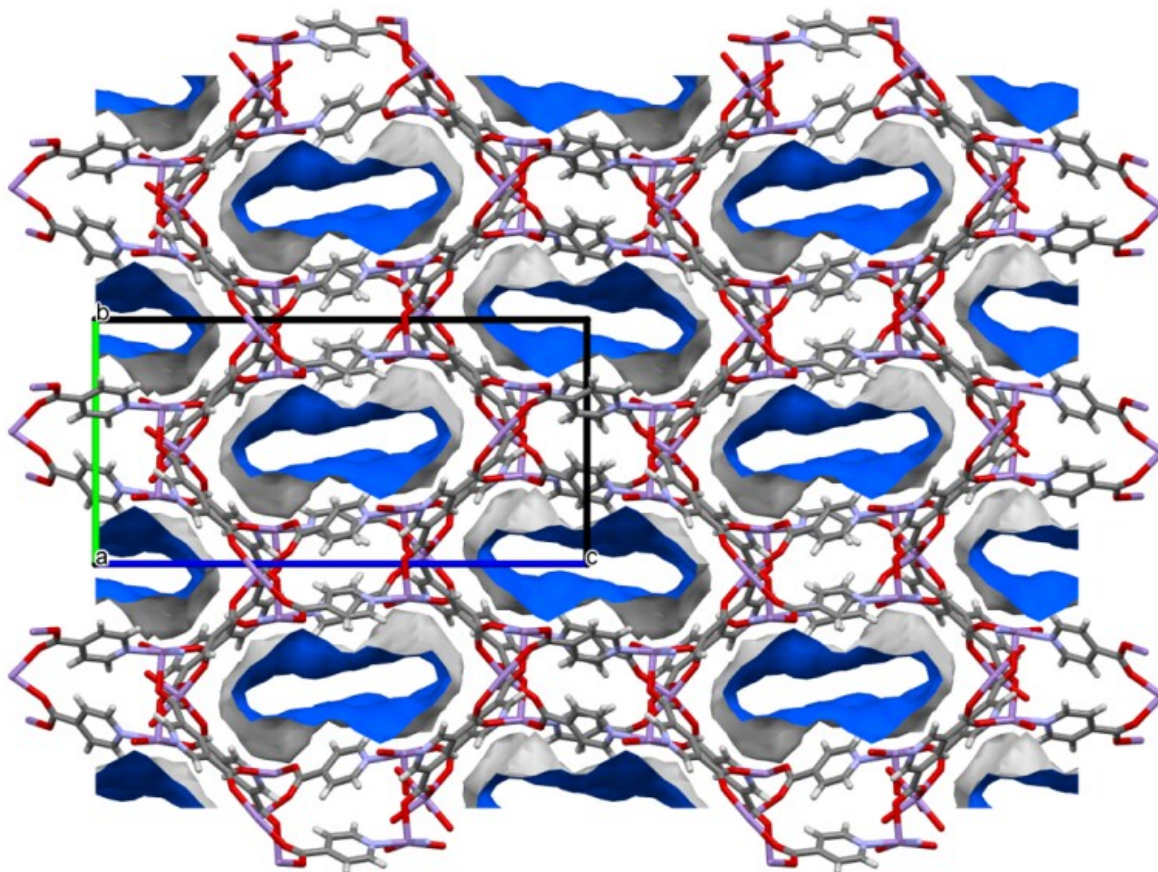

**Fig. S12** Solvent accessible void space in the network in **[3]** after the removal of the coordinated DMF molecules down to  $a$  (a). (The internal wall is blue). The approximate dimensions of the channels are 17 x 9 Å.

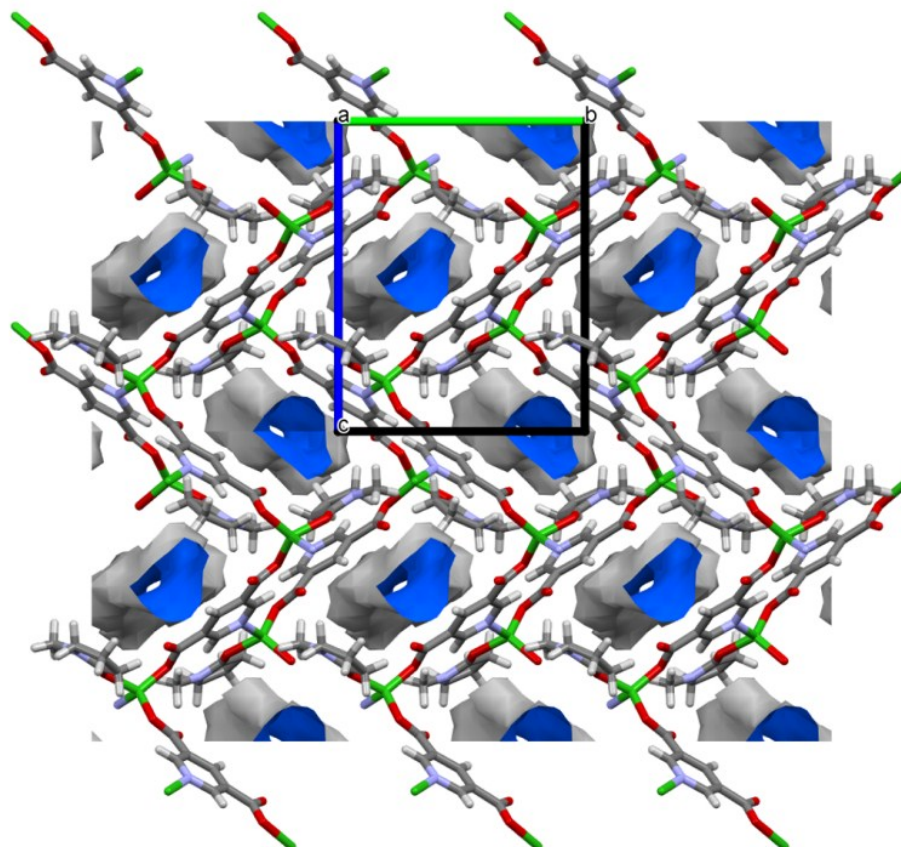

**Fig. S13** Solvent accessible void space in the network in **[4]** down to  $a$  (a). (The internal wall is blue). The diameter of the channels is approximately 4 – 5 Å.



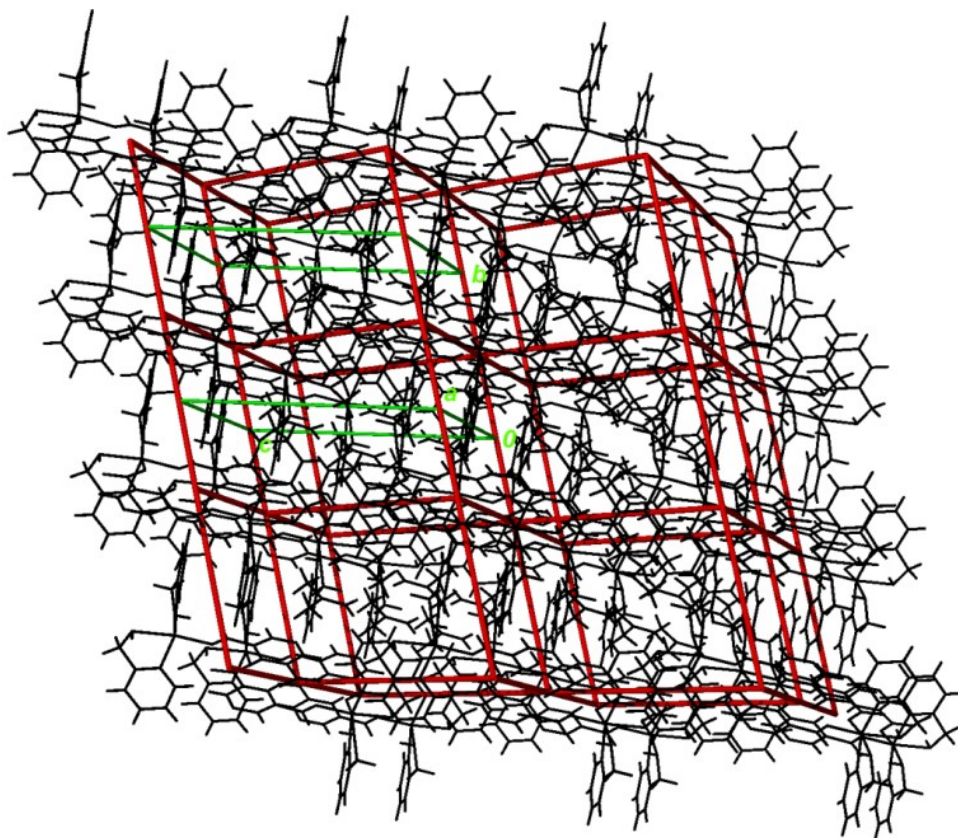

**Fig. S14** A perspective view of the **pcu** framework formed in **[7]** via  $\pi - \pi$  stacking interactions. The network nodes are located on the centroids of the binuclear complex.

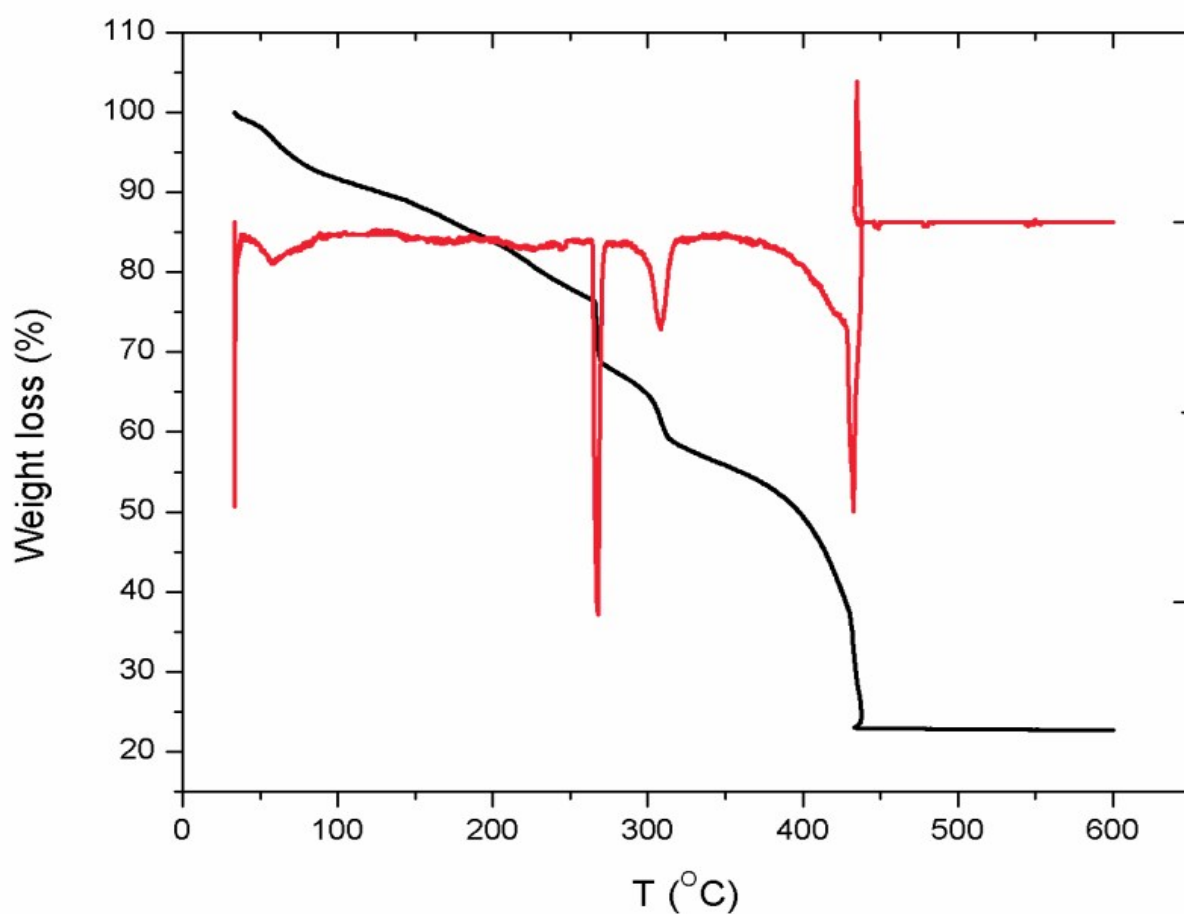

**Fig. S15** The TG/DTG curves for  $[[[(\text{CH}_3)_2\text{NH}_2]_2[\text{Cd}_2(\text{PDC})_3]]_n \cdot 4n\text{DMF} \cdot 6n\text{H}_2\text{O}$ , **[1]**.

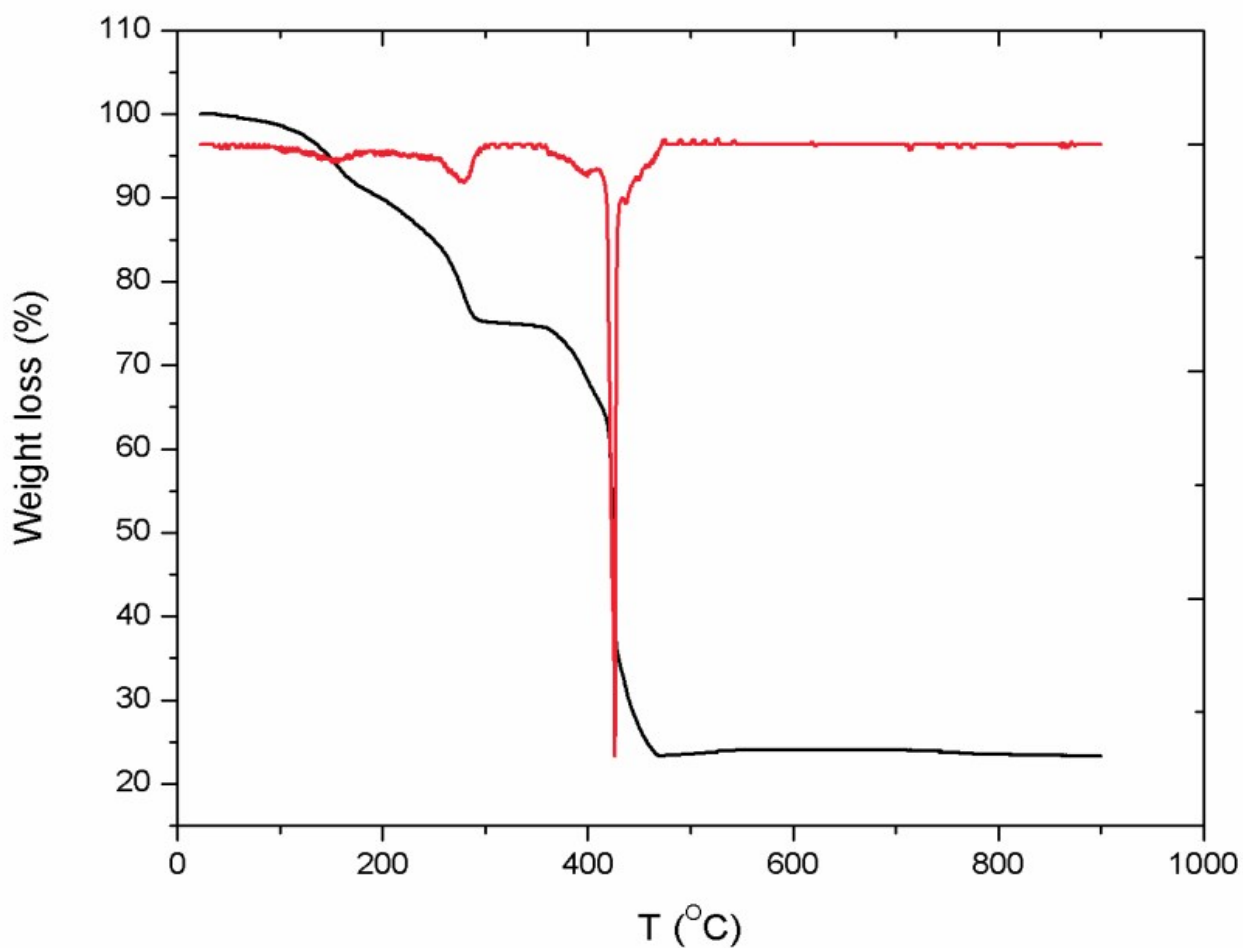

Fig. S16 The TG/DTG curves for  $[\text{Mn}(\text{PDC})(\text{DMF})]_n$ , [2]

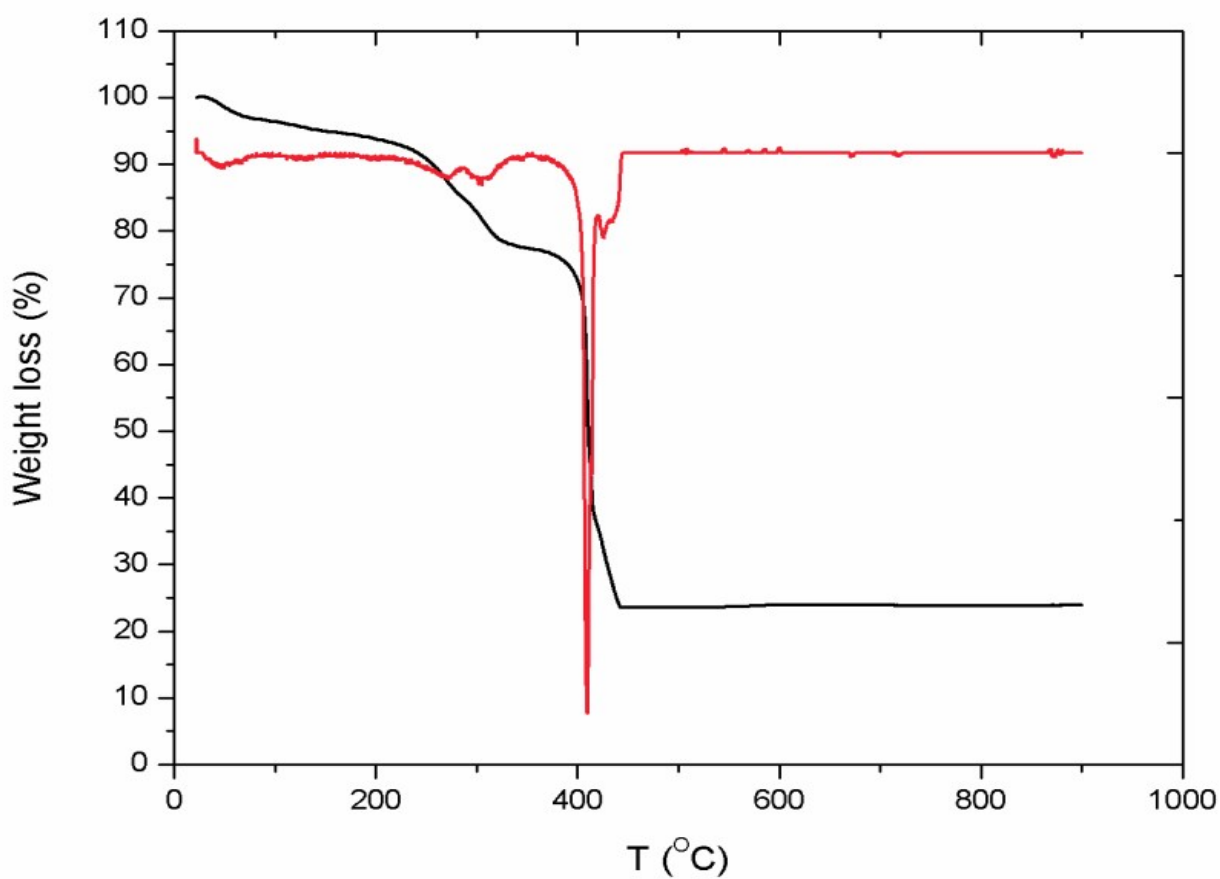

Fig. S17 The TG/DTG curves for  $[\text{Mn}_3(\text{PDC})_2(\text{INA})_2(\text{DMF})_{1.5}(\text{H}_2\text{O})_{0.5}]_n \cdot n\text{DMF} \cdot 2n\text{H}_2\text{O}$ , [3].

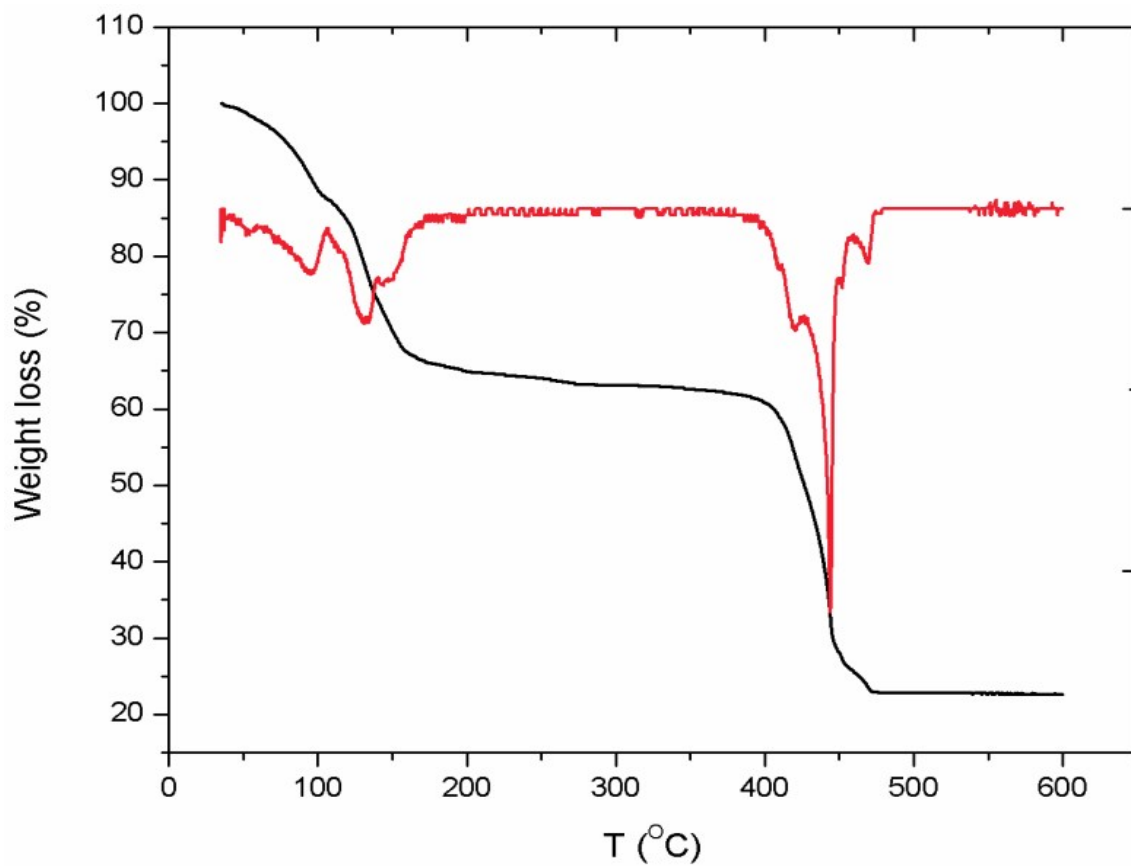

Fig. S18 The TG/DTG curves for  $[\text{Zn}(\text{PDC})(\text{NMP})]_n \cdot n\text{H}_2\text{O}$ , [4].

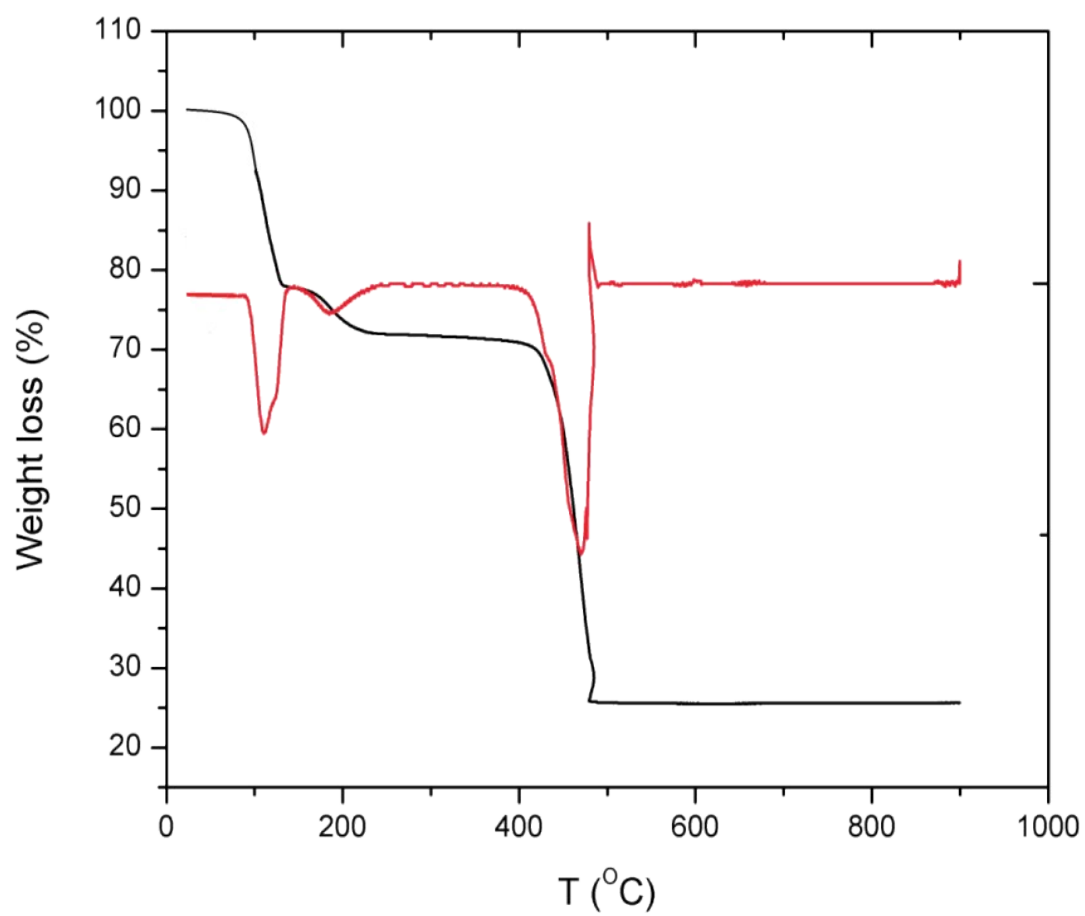

Fig. S19 The TG/DTG curves for  $[\text{Zn}(\text{PDC})(\text{H}_2\text{O})(\text{DMF})]_n$ , [5].



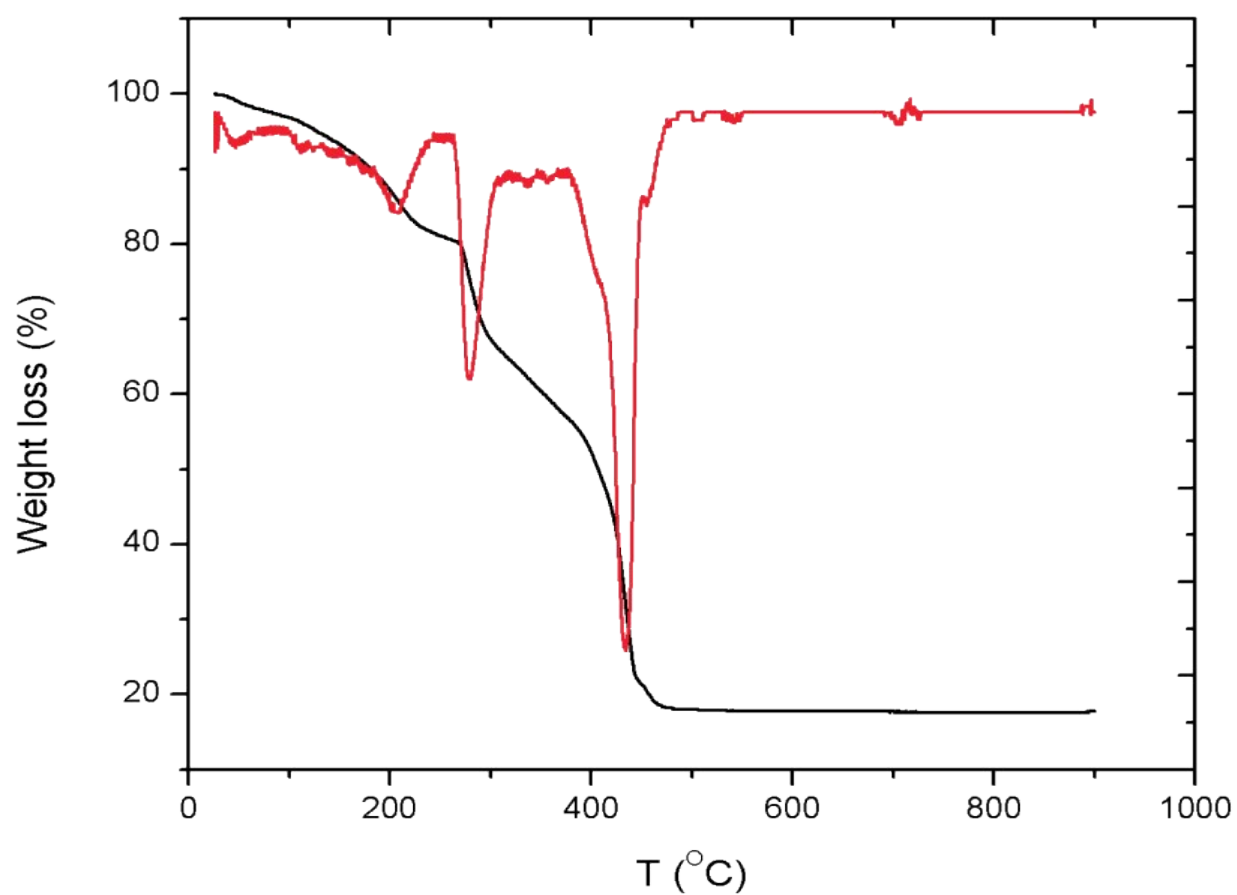

Fig. S20 The TG/DTG curves for  $[\text{Zn}(\text{PDC})(3\text{hmpH})]_n \cdot n\text{DMF} \cdot 0.5n\text{H}_2\text{O}$ , [6].

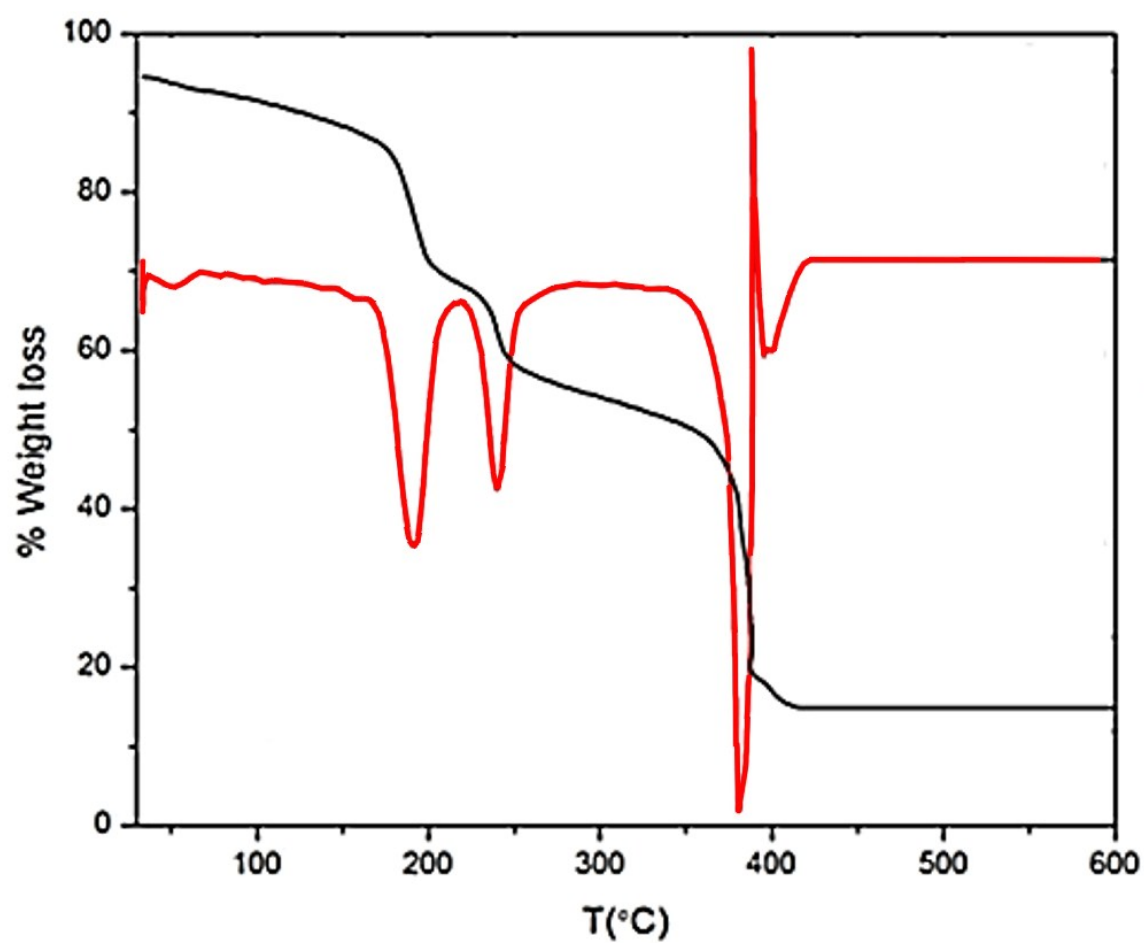

Fig. S21 The TG/DTG curves for  $[\text{Zn}(\text{PDC})(2\text{hmpH})_2]_2 \cdot 2\text{DMF}$ , [7].

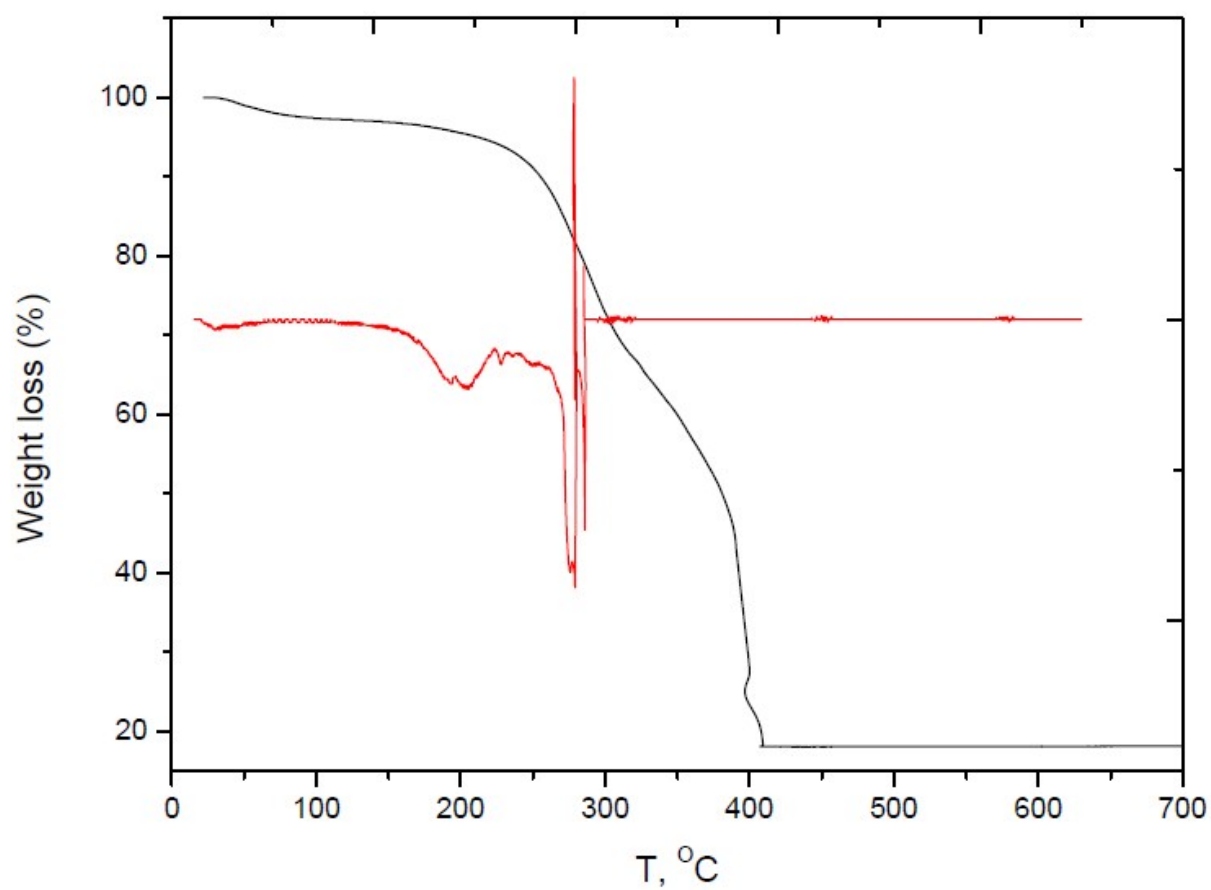

Fig. S22 The TG/DTG curves for  $[\text{Co}(\text{PDC})(3\text{hmpH})_2]_n \cdot 0.25n\text{DMF}$ , [8].

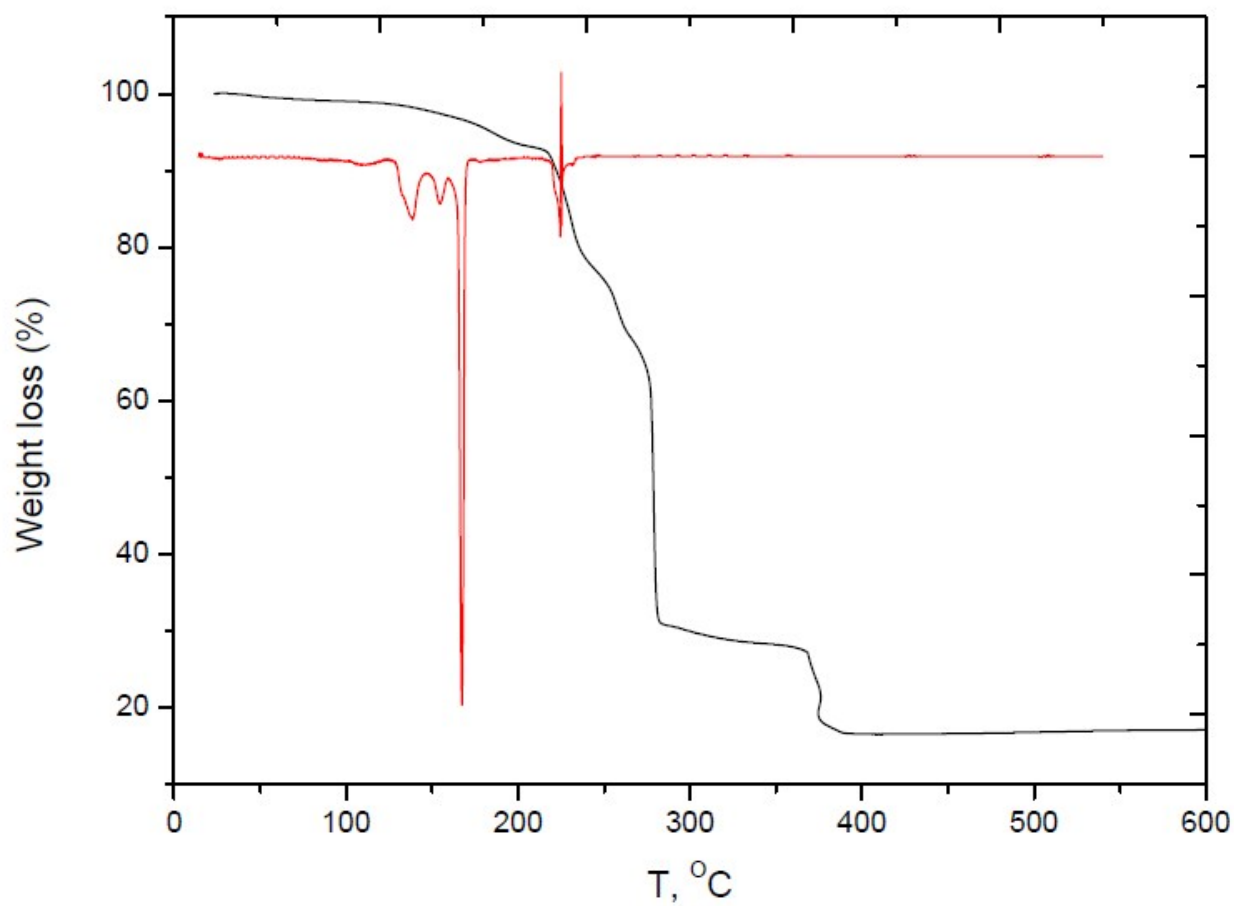

Fig. S23 The TG/DTG curves for  $[\text{Cu}(\text{PDC})(3\text{hmpH})_2]_n \cdot 0.5n\text{DMF}$ , [9].
